# Supplementary material for: Genomic Expression Analysis Reveals Strategies of Burkholderia cenocepacia to Adapt to Cystic Fibrosis Patients' Airways and Antimicrobial Therapy
Source: PubMed Central journal article supplement (PMC3244429; doi:10.1371/journal.pone.0028831), 2011-12-21

**Table S1 - List of genes up-regulated (above 1.5-fold) in *B. cenocepacia* IST4113, compared to IST439.** The genes whose transcript level in the *B. cenocepacia* IST4113 variant were at least 1.5-fold higher than the levels attained in the IST439 were selected. The description of gene function is based on the information available in the "*Burkholderia* Genome Database" and in "KEEG pathways" database and the functional clustering was performed using the functional classes shown in Figure 1. Genes specific of the AU1054 strain are shaded in grey

| <b>ORF/Gene</b>                                         | <b>Function</b>                                  | <b><u>mRNA IST4113</u><br/><u>mRNA IST439</u></b> |
|---------------------------------------------------------|--------------------------------------------------|---------------------------------------------------|
| <b><i>Carbohydrate metabolism</i></b>                   |                                                  |                                                   |
| <i>Electron transport and oxidative phosphorylation</i> |                                                  |                                                   |
| BCAL0030/atpB                                           | F0F1 ATP synthase subunit A                      | 1.6                                               |
| BCAL0037/atpC                                           | F0F1 ATP synthase subunit epsilon                | 1.7                                               |
| BCAL2050                                                | 4Fe-4S ferredoxin                                | 1.6                                               |
| BCAM0166/ndh                                            | NADH dehydrogenase                               | 3.0                                               |
| BCAM0182                                                | Putative cytochrome b561                         | 2.4                                               |
| BCAM0692                                                | Putative NADPH-dependent FMN reductase           | 1.5                                               |
| BCAM1386                                                | Putative cytochrome c                            | 2.0                                               |
| BCAM2299                                                | Putative cytochrome c                            | 2.5                                               |
| BCAM2300                                                | Putative cytochrome c                            | 2.3                                               |
| BCAS0417                                                | Putative cytochrome c                            | 1.9                                               |
| BCAM2674                                                | Putative cytochrome oxidase subunit I            | 2.7                                               |
| BCAM2675                                                | Putative cytochrome oxidase subunit II           | 1.5                                               |
| BCAM1961                                                | Copper binding protein; similar to plastocyanine | 1.9                                               |

### *Biosynthesis of vitamins and coenzymes*

|               |                                                                                                                                                                      |     |
|---------------|----------------------------------------------------------------------------------------------------------------------------------------------------------------------|-----|
| BCAL0599      | Putative aminotransferase presumed to be involved in biotin synthesis                                                                                                | 3.6 |
| BCAS0383      | Putative adenosylmethionine-8-amino-7-oxononanoate transaminase involved in biotin biosynthesis                                                                      | 2.6 |
| BCAM1978      | Adenosylmethionine-8-amino-7-oxononanoate aminotransferase presumed to be involved in biotin biosynthesis                                                            | 2.1 |
| BCAL0915      | Putative 3,4-dihydroxy-2-butanone 4-phosphate synthase involved in riboflavin biosynthesis from ribulose-1,5-biphosphate                                             | 1.8 |
| BCAL0206      | Indolepyruvate ferredoxin oxidoreductase that catalyses the oxidative decarboxylation of arylpyruvates                                                               | 2.6 |
| BCAL2717/nadC | Nicotinate-nucleotide pyrophosphorylase, required for NAD biosynthesis                                                                                               | 1.6 |
| BCAL2718/nadA | Quinolinate synthetase, required for NAD biosynthesis                                                                                                                | 1.7 |
| BCAL3050/ribD | Multifunctional riboflavin biosynthetic protein (includes: diaminohydroxyphosphoribosylaminopyrimidine deaminase; 5-amino-6-(5-phosphoribosylamino)uracil reductase) | 1.6 |
| BCAL3051/ribE | Riboflavin synthase subunit alpha                                                                                                                                    | 1.5 |
| BCAL3049/hemL | Glutamate-1-semialdehyde 2,1-aminomutase involved in porphyrin biosynthesis                                                                                          | 1.5 |

### *Glyoxylate cycle*

|               |                                                                                         |     |
|---------------|-----------------------------------------------------------------------------------------|-----|
| BCAL2122/aceB | Malate synthase; required for the biosynthesis of malate from glyoxylate and acetyl-CoA | 1.6 |
| BCAM1588      | Isocitrate lyase                                                                        | 2.3 |

### *Acetoin catabolism*

|               |                                                                              |     |
|---------------|------------------------------------------------------------------------------|-----|
| BCAL1908/lipA | Putative lipoate synthase involved in lipoic acid biosynthesis               | 3.5 |
| BCAL1909/acoC | Branched-chain alpha-keto acid dehydrogenase subunit E2                      | 4.8 |
| BCAL1910/acoB | Acetoin:2,6-dichlorophenolindophenol oxidoreductase beta subunit             | 1.8 |
| BCAL1911/acoA | Acetoin:2,6-dichlorophenolindophenol oxidoreductase alpha subunit            | 2.5 |
| BCAL1913/acoX | Acetoin catabolism protein                                                   | 3.6 |
| BCAL1225      | Putative aminohydrolase similar to hydrolases involved in acetoin catabolism | 1.7 |

### *Benzoate catabolism*

|               |                                                                                                     |     |
|---------------|-----------------------------------------------------------------------------------------------------|-----|
| BCAS0494/benC | Benzoate 1,2-dioxygenase electron transfer component                                                | 2.2 |
| BCAS0495/benB | Benzoate 1,2-dioxygenase beta subunit                                                               | 2.0 |
| BCAS0496/benA | Benzoate 1,2-dioxygenase alpha subunit                                                              | 1.6 |
| BCAS0497/catA | Catechol 1,2-dioxygenase 2                                                                          | 2.8 |
| BCAM0606      | Related to carboxymuconolactone decarboxylases; predicted to function in benzoate degradation       | 2.4 |
| BCAL1775      | Reductase component of dioxygenase system predicted to be involved in degradation of aminobenzoates | 2.0 |

### *Others*

|               |                                                                                                                           |     |
|---------------|---------------------------------------------------------------------------------------------------------------------------|-----|
| BCAL3285/hmpA | Flavoheprotein presumed to be involved in phenylacetate catabolism                                                        | 1.5 |
| BCAS0053/msuE | FMN reductase                                                                                                             | 1.6 |
| BCAM2122      | Acetaldehyde dehydrogenase that converts acetyl-CoA into acetaldehyde                                                     | 3.1 |
| BCAL0780      | Putative multiphosphoryl transfer protein predicted to be involved in phosphorylation of fructose and phosphoenolpyruvate | 1.8 |
| BCAM0551      | Similar to ribulose-5-phosphate 4-epimerase and related epimerases and aldolases                                          | 1.6 |
| BCAL0778      | Putative N-acetylglucosamine-6-phosphate deacetylase                                                                      | 3.2 |

## **Aminoacid and nitrogen metabolism**

### *Ammonium metabolism*

|               |                                          |     |
|---------------|------------------------------------------|-----|
| BCAL2224/glnA | Glutamine synthetase                     | 1.6 |
| BCAL0600      | Putative glutamine synthetase            | 2.4 |
| BCAM2301      | Putative methylamine dehydrogenase       | 2.3 |
| BCAM2302A     | Putative methylamine utilization protein | 2.2 |
| BCAM2304      | Putative methylamine dehydrogenase       | 1.9 |

### *Glycine catabolism*

|               |                                                  |     |
|---------------|--------------------------------------------------|-----|
| BCAL0075/gcvT | Glycine cleavage system aminomethyltransferase T | 2.4 |
| BCAL0073/gcvP | Glycine dehydrogenase                            | 2.0 |

|                                                      |                                                                                                               |     |
|------------------------------------------------------|---------------------------------------------------------------------------------------------------------------|-----|
| BCAL0074/gcvH                                        | Glycine cleavage system protein H                                                                             | 2.7 |
| <i>Histidine catabolism</i>                          |                                                                                                               |     |
| BCAL2240/hutG                                        | N-formylglutamate deformylase                                                                                 | 1.9 |
| BCAL2241                                             | N-formimino-L-glutamate deiminase                                                                             | 1.5 |
| BCAL2244/hutU                                        | Urocanate hydratase                                                                                           | 1.5 |
| BCAS0114                                             | Putative histidine ammonia-lyase                                                                              | 1.5 |
| <i>Aspartate, glutamate and glutamine metabolism</i> |                                                                                                               |     |
| BCAM0746/argG                                        | argininosuccinate synthase involved in arginine biosynthesis                                                  | 1.5 |
| BCAL2146/ask                                         | aspartate kinase involved in aspartate catabolism                                                             | 2.9 |
| <i>Phenylalanine metabolism</i>                      |                                                                                                               |     |
| BCAM1315/amiE                                        | Acylamide amidohydrolase presumed to be involved in putrescine biosynthesis                                   | 2.7 |
| BCAM0810                                             | Putative aromatic oxygenase presumed to be involved in phenylalanine catabolism                               | 1.5 |
| BCAM0811                                             | Putative aromatic oxygenase presumed to be involved in phenylalanine catabolism                               | 1.7 |
| BCAM1979/feaB                                        | Phenylacetaldehyde dehydrogenase                                                                              | 1.5 |
| <i>Others</i>                                        |                                                                                                               |     |
| BCAM1704/adh                                         | 2,3-butanediol dehydrogenase involved in threonine catabolism                                                 | 5.3 |
| BCAM1151                                             | Methylmalonate-semialdehyde dehydrogenase; involved in valine catabolism                                      | 1.7 |
| BCAL2354/leuA                                        | 2-isopropylmalate synthase involved in leucine biosynthesis                                                   | 1.6 |
| BCAM0540                                             | Putative serine acetyltransferase that converts serine in acetyl-serine; involved in biosynthesis of cysteine | 1.6 |
| BCAM0976                                             | Putative amidinotransferase predicted to be involved in citrullin biosynthesis                                | 2.5 |
| BCAL1796                                             | Predicted saccharopine dehydrogenase involved in lysine biosynthesis                                          | 1.5 |
| BCAS0211                                             | Putative pyridoxal-dependent decarboxylase presumed to be involved in lysine biosynthesis                     | 1.5 |
| BCAL1926/hom                                         | Homoserine dehydrogenase; involved in formation of homoserine                                                 | 1.6 |
| BCAL0603/puuC                                        | $\gamma$ -glutamyl-gamma-aminobutyraldehydedehydrogenase                                                      | 1.7 |
| BCAM0543                                             | Putative aminotransferase presumed to be involved in the interconversion of alanine and selenocistheyne       | 1.5 |

|               |                                                                                                                                                   |     |
|---------------|---------------------------------------------------------------------------------------------------------------------------------------------------|-----|
| BCAS0381/gabD | succinate-semialdehyde dehydrogenase involved in formation of succinate from glutamate                                                            | 1.5 |
| BCAL3282/aroG | phospho-2-dehydro-3-deoxyheptonate aldolase involved in biosynthesis of chorismate (a precursor of aromatic amino acids) from phosphoenolpyruvate | 1.6 |

### **Purine and pyrimidine metabolism**

|               |                                                                                                               |     |
|---------------|---------------------------------------------------------------------------------------------------------------|-----|
| BCAL1872      | Putative nucleotide phosphoribosyltransferase                                                                 | 1.5 |
| BCAL1887      | Nucleoside diphosphate kinase involved in conversion of Inosinate triphosphate to inosinate biphosphate       | 1.7 |
| BCAL2061/guaA | GMP synthase                                                                                                  | 1.7 |
| BCAL2063/guaB | Inosine 5'-monophosphate dehydrogenase that converts inosine monophosphate into xanthosine monophosphate      | 1.5 |
| BCAL3138/pyrX | Dihydroorotase that converts carbamoyl aspartic acid into 4,5-dihydroorotic acid in pyrimidine biosynthesis   | 1.6 |
| BCAL0204/pyrE | Orotate phosphoribosyltransferase that converts orotate into orotidine-5-phosphate in pyrimidine biosynthesis | 1.5 |

### **Lipid metabolism**

|               |                                                                                       |     |
|---------------|---------------------------------------------------------------------------------------|-----|
| BCAL0391/acpD | Acyl carrier protein phosphodiesterase                                                | 2.4 |
| BCAL1435/idh  | Inositol 2-dehydrogenase                                                              | 2.1 |
| BCAL1436      | Putative dehydratase presumed to be involved in inositol phosphate metabolism         | 1.7 |
| BCAL1862/phbA | Acetyl-CoA acetyltransferase                                                          | 1.5 |
| BCAL2725/lspA | Lipoprotein signal peptidase                                                          | 1.5 |
| BCAM0171      | Putative fatty acid desaturase                                                        | 2.0 |
| BCAM1582      | 3-alpha-(or 20-beta)-hydroxysteroid dehydrogenase involved in fatty acid biosynthesis | 1.6 |
| BCAM2526      | Putative monooxygenase similar to Acyl-CoA dehydrogenases                             | 1.8 |
| BCAS0346      | Putative dehydrogenase similar to acyl-CoA dehydrogenases                             | 2.0 |
| BCAS0419      | Putative acyl-CoA dehydrogenase protein                                               | 1.6 |

### **Sulphur metabolism**

|          |                                                                                   |     |
|----------|-----------------------------------------------------------------------------------|-----|
| BCAM1121 | Putative taurine dioxygenase (similar to TauD) that converts taurine into sulfite | 3.7 |
| BCAM1122 | Putative taurine dioxygenase (similar to TauD) that converts taurine into sulfite | 4.1 |
| BCAS0426 | Putative taurine dioxygenase (similar to TauD) that converts taurine into sulfite | 1.6 |

|               |                                                                                                                       |     |
|---------------|-----------------------------------------------------------------------------------------------------------------------|-----|
| BCAM1676      | Putative nitrite/sulfite reductase that reduces sulfite into H <sub>2</sub> S; involved in biosynthesis of L-cysteine | 1.6 |
| BCAM1391      | Putative alkanesulfonate monooxygenase which convert alkanesulfonates into sulfite                                    | 1.6 |
| BCAM1565      | Putative alkanesulfonate monooxygenase which reduce alkanesulfonates into sulfite                                     | 1.9 |
| BCAL1619/ssuD | Putative alkanesulfonate monooxygenase which reduce alkanesulfonates into sulfite                                     | 1.7 |
| BCAM0557      | Putative alkanesulfonate monooxygenase which reduce alkanesulfonates into sulfite                                     | 3.4 |
| BCAS0054      | Putative alkanesulfonate monooxygenase which reduce alkanesulfonates into sulfite                                     | 4.5 |
| BCAL2049      | Putative oxidoreductase presumed to be involved in conversion of adenylnylsulfate into sulfite                        | 1.7 |

## **Transport**

### *Sulphur-based compounds*

|               |                                                                                                                                       |     |
|---------------|---------------------------------------------------------------------------------------------------------------------------------------|-----|
| BCAL0711/tauA | Periplasmic component of the ABC taurine transporter TauABC                                                                           | 3.2 |
| BCAL0712/tauB | ATPase component of the ABC taurine transporter TauABC                                                                                | 2.2 |
| BCAL0713/tauC | Permease component of taurine ABC transporter TauABC                                                                                  | 2.5 |
| BCAL1620/ssuC | Permease component of the ABC transporter of aliphatic sulfonates SsuABC                                                              | 1.8 |
| BCAL1621/ssuB | ATPase component of the ABC transporter of aliphatic sulfonates SsuABC                                                                | 1.7 |
| BCAL2051      | Periplasmic component of the Putative alkanesulfonates ABC transporter SsuABC                                                         | 1.6 |
| BCAL2052      | Permease component of a Putative alkanesulfonates ABC transporter                                                                     | 1.9 |
| BCAL2053      | ATPase component of a Putative alkanesulfonates ABC transporter                                                                       | 1.6 |
| BCAM0555      | Periplasmic component of a Putative alkanesulfonates ABC transporter                                                                  | 2.1 |
| BCAM0556      | Periplasmic component of a Putative alkanesulfonates ABC transporter                                                                  | 2.8 |
| BCAM0558      | Periplasmic component of a Putative alkanesulfonates ABC transporter                                                                  | 3.4 |
| BCAM1123      | ATPase component of a Putative alkanesulfonates ABC transporter                                                                       | 3.0 |
| BCAM1124      | Permease component of a Putative alkanesulfonates ABC transporter                                                                     | 2.4 |
| BCAM1125      | Permease component of a Putative alkanesulfonates ABC transporter                                                                     | 2.0 |
| BCAM1126      | Periplasmic component of a Putative alkanesulfonates ABC transporter                                                                  | 2.2 |
| BCAM1377      | Predicted ATPase component of a sulfate ABC transporter; similar to PotA which is involved in the uptake of spermidine and putrescine | 2.1 |
| BCAM1378      | Predicted substrate-binding component of a sulfate ABC transporter                                                                    | 2.1 |
| BCAM1379      | Predicted periplasmic component component of a sulfate ABC transporter                                                                | 1.5 |

|                                |                                                                                                                                           |     |
|--------------------------------|-------------------------------------------------------------------------------------------------------------------------------------------|-----|
| BCAM1387                       | ATPase component of a Putative sulfonate ABC transporter                                                                                  | 1.5 |
| BCAM1389                       | Periplasmic component of a Putative sulfonate ABC transporter                                                                             | 1.9 |
| BCAM1566                       | Periplasmic component of a Putative sulfonate ABC transporter                                                                             | 2.0 |
| BCAS0340                       | ATPase component of a Putative sulfonate ABC transporter                                                                                  | 1.9 |
| BCAS0341                       | Permease component of a Putative alkanesulfonates ABC transporter                                                                         | 1.5 |
| BCAS0342                       | Periplasmic component of a Putative sulfonate ABC transporter                                                                             | 1.8 |
| BCAS0425                       | Predicted periplasmic component of an alkanesulfonate transporter                                                                         | 2.2 |
| <i>Polyamines</i>              |                                                                                                                                           |     |
| BCAL0595/potI                  | Permease component II of the PotABCD ABC transporter involved in the uptake of spermidine and putrescine                                  | 2.7 |
| BCAL0596/potH                  | Permease component I of the PotABCD ABC transporter involved in the uptake of spermidine and putrescine                                   | 1.7 |
| BCAL0598/potF                  | Spermidine/putrescine-binding periplasmic protein; subunit of the PotABCD transporter involved in the uptake of spermidine and putrescine | 2.7 |
| <i>Drugs</i>                   |                                                                                                                                           |     |
| BCAL1079/mdtC                  | Subunit of the multidrug resistance transporter MdtABC of the RND superfamily                                                             | 1.6 |
| BCAL1080/mdtB                  | Subunit of the multidrug resistance transporter MdtABC of the RND superfamily                                                             | 1.6 |
| BCAL1081/mdtA                  | Subunit of the multidrug resistance transporter MdtABC of the RND superfamily                                                             | 1.7 |
| BCAL2822/bpeA                  | Multidrug resistance transporter of the RND family                                                                                        | 1.6 |
| BCAM0201                       | Similar to the multidrug resistance transporter EmrB from E. coli                                                                         | 1.6 |
| BCAM2188                       | Outer membrane protein; component of a predicted macrolide-specific efflux system                                                         | 2.2 |
| <i>Aminoacids and peptides</i> |                                                                                                                                           |     |
| BCAM0978/lysP                  | Lysine-specific permease                                                                                                                  | 1.7 |
| BCAL1668                       | Predicted periplasmic component of a Putative arginine/ornithine/lysine ABC transporter                                                   | 1.9 |
| BCAL0019                       | Predicted ATPase component of a Putative aminoacid ABC transporter                                                                        | 1.6 |
| BCAL0151                       | Predicted periplasmic component of an ABC aminoacid transporter                                                                           | 1.5 |
| BCAL0766                       | Putative branched-chain amino acid transport system permease protein                                                                      | 2.0 |
| BCAL1252                       | Putative proline/betaine transporter                                                                                                      | 2.2 |
| BCAL1423                       | Predicted ATPase component of a Putative aminoacid ABC transporter                                                                        | 2.0 |
| BCAL2729                       | Putative amino acid permease predicted to be involved in uptake of GABA                                                                   | 1.9 |

|               |                                                                                         |     |
|---------------|-----------------------------------------------------------------------------------------|-----|
| BCAM0610      | Predicted periplamic component of an ABC aminoacid transporter                          | 1.6 |
| BCAM0611      | Predicted permease component of a Putative aminoacid ABC transporter                    | 1.7 |
| BCAM0612      | Predicted ATPase component of a Putative aminoacid ABC transporter                      | 1.5 |
| BCAM1219      | Predicted periplamic component of an ABC aminoacid transporter                          | 1.5 |
| BCAM1427      | Putative Homoserine/Threonine efflux protein                                            | 5.3 |
| BCAM1449A     | Putative amino acid permease                                                            | 1.7 |
| BCAM1560      | Predicted periplasmic component of a Putative arginine/ornithine/lysine ABC transporter | 1.5 |
| BCAM1563      | Predicted ATPase component of a Putative aminoacid ABC transporter                      | 2.2 |
| BCAM1564      | Predicted periplasmic component of a Putative aminoacid ABC transporter                 | 1.9 |
| BCAM2247      | ATPase component of a Putative branched aminoacid ABC transporter                       | 2.1 |
| BCAM2248/livG | ATPase component of a leucine/isoleucine/valine aminoacid ABC transporter               | 2.0 |
| BCAM2249/livM | Permease component of a leucine/isoleucine/valine aminoacid ABC transporter             | 1.9 |
| BCAM2618/argT | Periplasmic component of a Putative arginine/ornithine/lysine ABC transporter           | 1.9 |
| BCAM2250      | Predicted permease component of a Putative aminoacid ABC transporter                    | 1.6 |
| BCAM2251      | Predicted periplasmic component of a Putative aminoacid ABC transporter                 | 1.8 |
| BCAM2316      | Putative amino acid permease                                                            | 1.5 |
| BCAM2529      | ATPase component of a Putative methionine transporter                                   | 1.7 |
| BCAM2724/oppF | ATPase component of Putative oligopeptide ABC transporter                               | 1.8 |
| BCAM2725/oppD | ATPase component of Putative oligopeptide ABC transporter                               | 2.0 |
| BCAM2726/oppC | Permease component of Putative oligopeptide ABC transporter                             | 1.7 |
| BCAS0110      | Predicted periplasmic component of a Putative arginine/ornithine/lysine ABC transporter | 1.6 |
| BCAS0136      | Putative amino acid permease                                                            | 4.6 |
| BCAS0574      | Predicted ATPase component of a Putative aminoacid ABC transporter                      | 1.5 |
| BCAS0575      | Predicted permease component of a Putative aminoacid ABC transporter                    | 1.6 |
| Bcen_1448     | lysine exporter protein; similar to LysE and YggA                                       | 2.9 |

### *Ions*

|          |                                                                                  |     |
|----------|----------------------------------------------------------------------------------|-----|
| BCAL0055 | Putative heavy metal resistance membrane ATPase                                  | 1.5 |
| BCAM0238 | Putative ion transporter                                                         | 2.4 |
| BCAM0439 | Putative cation efflux system; similar to CzcD which mediates efflux of Co/Zn/Cd | 1.6 |
| BCAM1770 | Predicted periplasmic component of a Putative nickel ABC transporter             | 1.8 |
| BCAM1771 | Predicted ATPase component of a Putative nickel ABC transporter                  | 1.7 |
| BCAM1772 | Predicted permease component of a Putative nickel ABC transporter                | 2.1 |
| BCAM1773 | Predicted ATPase component of a Putative nickel ABC transporter                  | 2.1 |



|               |                                                                                                                                                                                           |     |
|---------------|-------------------------------------------------------------------------------------------------------------------------------------------------------------------------------------------|-----|
| BCAM1774      | Predicted ATPase component of a Putative nickel ABC transporter                                                                                                                           | 1.6 |
| BCAS0388      | Predicted periplasmic component of a dipeptide/oligopeptide/nickel transporter                                                                                                            | 2.7 |
| BCAS0389      | Predicted permease component of a dipeptide/oligopeptide/nickel transporter                                                                                                               | 1.9 |
| BCAS0390      | Predicted permease component of a dipeptide/oligopeptide/nickel transporter                                                                                                               | 2.4 |
| BCAS0391      | Predicted ATPase component of a dipeptide/oligopeptide/nickel transporter                                                                                                                 | 2.8 |
| BCAM0712/czcB | Putative cobalt-zinc-cadmium transporter                                                                                                                                                  | 1.5 |
|               | Similar to E. coli TolQ which is a subunit of the TolQRA complex that are involved in the maintenance of outer membrane permeability and are required for the uptake of iron siderophores | 2.7 |
| BCAM0560      |                                                                                                                                                                                           |     |
|               | Similar to E. coli TolR which is a subunit of the TolQRA complex that are involved in the maintenance of outer membrane permeability and are required for the uptake of iron siderophores | 3.4 |
| BCAM0561      |                                                                                                                                                                                           |     |
| <i>Sugars</i> |                                                                                                                                                                                           |     |
| BCAL1377      | H <sup>+</sup> /citrate symporter                                                                                                                                                         | 1.8 |
| BCAL1431      | Putative ribose ABC transport system, substrate-binding exported protein                                                                                                                  | 1.8 |
| BCAL0781      | Phosphotransferase system IIC components; specific for glucose/maltose/N-acetylglucosamine                                                                                                | 3.2 |
| BCAM0153/kgdT | 2-keto-3-deoxygluconate permease                                                                                                                                                          | 1.8 |
| BCAL1092      | Periplasmic component of a ABC transporter similar to a 2-aminoethylphosphonate transport system                                                                                          | 1.7 |
| BCAM2509      | Putative fucose transporter                                                                                                                                                               | 1.6 |
| BCAL0640      | Major Facilitator Superfamily protein; similar to sugar permeases                                                                                                                         | 1.6 |
| BCAL1223      | Major Facilitator Superfamily protein; similar to arabinose efflux permeases                                                                                                              | 1.6 |
| BCAM0036      | Major Facilitator Superfamily protein; similar to sugar phosphate permeases                                                                                                               | 2.7 |
| BCAM0441      | Major Facilitator Superfamily protein; similar to arabinose efflux permeases                                                                                                              | 1.9 |
| BCAM0563      | Major Facilitator Superfamily protein similar to arabinose efflux permeases                                                                                                               | 2.2 |
| BCAM0098      | Permease component of a Putative ABC sugar transporter                                                                                                                                    | 1.9 |
| BCAM2806      | ATPase component of a Putative ABC sugar transporter                                                                                                                                      | 1.5 |
| BCAM1986      | Major Facilitator Superfamily protein; similar to sugar permeases                                                                                                                         | 1.9 |
| BCAM2545      | Major Facilitator Superfamily protein; similar to d-galactonate transporters                                                                                                              | 2.5 |
| BCAM2697      | Major Facilitator Superfamily protein; similar to d-galactonate transporters                                                                                                              | 2.1 |
| BCAS0122      | Similar to sugar phosphate permeases                                                                                                                                                      | 1.6 |
| BCAS0343      | Major Facilitator Superfamily protein; similar to sugar transporters                                                                                                                      | 1.8 |

|                                                |                                                                                                                                                                                           |     |
|------------------------------------------------|-------------------------------------------------------------------------------------------------------------------------------------------------------------------------------------------|-----|
| BCAS0438                                       | Predicted periplamic component of an ABC sugar transporter                                                                                                                                | 1.9 |
| <i>Ectoine</i>                                 |                                                                                                                                                                                           |     |
| BCAL1669                                       | Predicted permease component of a Putative ectoine ABC transporter                                                                                                                        | 1.8 |
| BCAL1670                                       | Predicted permease component of a Putative ectoine ABC transporter                                                                                                                        | 1.8 |
| BCAS0113                                       | Predicted ATPase component of a Putative ectoine ABC transporter                                                                                                                          | 1.5 |
| <i>Others</i>                                  |                                                                                                                                                                                           |     |
| BCAM1286                                       | Putative betaine/carnitine/choline family transporter                                                                                                                                     | 1.6 |
| BCAS0420                                       | Predicted permease component of a Putative nitrate ABC transporter                                                                                                                        | 1.5 |
| <b><i>Cell envelope and outer membrane</i></b> |                                                                                                                                                                                           |     |
| <i>LPS biosynthesis</i>                        |                                                                                                                                                                                           |     |
| BCAL2759                                       | Tetraacyldisaccharide-1-P 4'-kinase; predicted to be involved in LPS biosynthesis                                                                                                         | 2.2 |
| BCAL2180                                       | 3-deoxy-8-phosphooctulonate synthase presumed to be involved in synthesis of 3-deoxy-D-manno-octulosonic acid                                                                             | 1.5 |
| BCAM0214                                       | Putative glycosyltransferase presumed to be involved in LPS biosynthesis                                                                                                                  | 2.9 |
| <i>Peptidoglycan biosynthesis</i>              |                                                                                                                                                                                           |     |
| BCAL0110                                       | Predicted pyridoxal phosphate-dependent enzyme apparently involved in regulation of cell wall biogenesis                                                                                  | 1.6 |
| BCAL0482/mreB                                  | Rod shape-determining protein; presumed to be involved in the synthesis of the insertion of new peptidoglycan building units into the existing peptidoglycan layer to allow length growth | 1.9 |
| BCAL0779                                       | Putative phosphosugar-binding protein presumed to be involved in peptidoglycan synthesis                                                                                                  | 3.4 |
| BCAM2783/pehC                                  | Endopygalactorunase                                                                                                                                                                       | 1.7 |
| BCAM0220                                       | Putative outer membrane protein presumed to be involved in the secretion of peptidoglycan-associated (lipo)proteins                                                                       | 2.3 |
| <i>Adhesion</i>                                |                                                                                                                                                                                           |     |
| BCAM0184                                       | Lectin                                                                                                                                                                                    | 1.7 |
| BCAM0185                                       | Lectin                                                                                                                                                                                    | 1.5 |

|               |                                                                                                            |     |
|---------------|------------------------------------------------------------------------------------------------------------|-----|
| BCAM0219      | Putative haemagglutinin-related autotransporter protein                                                    | 1.5 |
| BCAM0223      | Putative haemagglutinin-related autotransporter protein                                                    | 3.8 |
| <i>Others</i> |                                                                                                            |     |
| BCAL1671      | Metallo peptidase, subfamily M23B                                                                          | 2.5 |
| BCAM0180      | metallo peptidase, subfamily M23B                                                                          | 3.3 |
| BCAL2466/eco  | ecotin                                                                                                     | 1.8 |
| BCAL2867/lepA | GTP-binding protein proposed to function as an exoprotease                                                 | 1.5 |
| BCAM0550      | Putative exported lipase                                                                                   | 1.9 |
| BCAL0906/Int  | Apolipoprotein N-acyltransferase                                                                           | 2.3 |
| BCAM0207      | Putative tyrosine-protein kinase; predicted to be involved in exopolysaccharide biosynthesis               | 1.6 |
| BCAM1376      | Putative outer membrane porin; similar to OmpC                                                             | 2.5 |
| BCAM1455      | Putative outer membrane porin; similar to OmpC                                                             | 1.9 |
| BCAS0066      | Putative outer membrane porin; similar to OmpC; 35% similar to the probable TonB-dependent receptor PA3268 | 3.1 |
| BCAM1974      | Putative outer membrane porin; similar to OmpC                                                             | 2.3 |
| BCAM1761      | Putative lipoprotein                                                                                       | 1.5 |
| BCAM0121      | Putative lipoprotein                                                                                       | 2.0 |
| BCAL3438      | Putative lipoprotein                                                                                       | 1.7 |
| BCAM1988      | Putative lipoprotein                                                                                       | 1.6 |
| BCAS0305      | Putative lipoprotein                                                                                       | 2.2 |
| BCAL0159      | Putative lipoprotein                                                                                       | 1.6 |
| BCAS0625      | Putative lipoprotein                                                                                       | 1.6 |
| BCAM0382      | Putative lipoprotein                                                                                       | 1.6 |
| BCAL2166      | Putative lipoprotein                                                                                       | 1.9 |
| BCAL1413A     | Putative lipoprotein                                                                                       | 1.7 |
| BCAM1678      | Putative lipoprotein; similar to bacterial virulence protein VirJ                                          | 1.8 |
| BCAM2620      | Putative lipoprotein                                                                                       | 2.0 |
| BCAS0627      | TPR repeat, SEL1 subfamily                                                                                 | 1.6 |

**Protein synthesis**

|                |                                                      |     |
|----------------|------------------------------------------------------|-----|
| BCAL0115/rpsU1 | Structural component of the ribosome                 | 2.0 |
| BCAL0222/rplK  | 50S ribosomal protein L11                            | 1.7 |
| BCAL0224/rplJ  | 50S ribosomal protein L10                            | 2.2 |
| BCAL0225/rplL  | 50S ribosomal protein L7/L12                         | 2.4 |
| BCAL0229/rpsL  | 30S ribosomal protein S12                            | 1.9 |
| BCAL230/rpsG   | 30S ribosomal protein S12                            | 1.8 |
| BCAL0233/rpsJ  | 30s ribosomal protein S10                            | 1.6 |
| BCAL0234/rplC  | 50S ribosomal protein L3                             | 2.3 |
| BCAL0235/rplD  | 50S ribosomal protein L4                             | 2.8 |
| BCAL0236/rplW  | 50S ribosomal protein L23                            | 2.5 |
| BCAL0237/rplB  | 50S ribosomal protein L2                             | 2.9 |
| BCAL0238/rpsS  | 30S ribosomal protein S19                            | 2.7 |
| BCAL0239/rplV  | 50S ribosomal protein L22                            | 2.8 |
| BCAL0240/rpsC  | 30S ribosomal protein S3                             | 2.8 |
| BCAL0241/rplP  | 50S ribosomal protein L16                            | 2.0 |
| BCAL0242/rpmC  | 50S ribosomal protein L29                            | 2.3 |
| BCAL0243/rpsQ  | 30S ribosomal protein S17                            | 2.6 |
| BCAL0244/rplN  | 50S ribosomal protein L14                            | 1.8 |
| BCAL0245/rplX  | 50S ribosomal protein L24                            | 1.5 |
| BCAL0246/rplE  | 50S ribosomal protein L5                             | 1.8 |
| BCAL0247/rpsN  | 30S ribosomal protein S14                            | 2.2 |
| BCAL0248/rpsH  | 30S ribosomal protein S8                             | 2.1 |
| BCAL0249/rplF  | 50S ribosomal protein L6                             | 1.9 |
| BCAL0250/rplR  | 50S ribosomal protein L18                            | 2.1 |
| BCAL0251/rpsE  | 30S ribosomal protein S5                             | 1.9 |
| BCAL0252/rpmD  | 50S ribosomal protein L30                            | 1.7 |
| BCAL0253/rplO  | 50S ribosomal protein L15                            | 1.9 |
| BCAL0256/rpmJ  | 50S ribosomal protein L36                            | 1.8 |
| BCAL0257/rpsM  | 30S ribosomal protein S13                            | 1.9 |
| BCAL0258/rpsK  | 30S ribosomal protein S11                            | 2.1 |
| BCAL0259/rpsD  | 30S ribosomal protein S4                             | 1.7 |
| BCAL0261/rplQ  | 50S ribosomal protein L17                            | 1.5 |
| BCAL0799       | 50S ribosomal protein L25/general stress protein Ctc | 1.9 |

|                |                                                                          |     |
|----------------|--------------------------------------------------------------------------|-----|
| BCAL0990/rpmF  | 50S ribosomal protein L32                                                | 1.9 |
| BCAL1483/rpmI  | 50S ribosomal protein L35                                                | 2.3 |
| BCAL1484/rpiT  | 50S ribosomal protein L20                                                | 2.2 |
| BCAL1905/rpmE2 | 50S ribosomal protein L31 type B                                         | 2.7 |
| BCAL1942/rplI  | 50S ribosomal protein L9                                                 | 2.0 |
| BCAL1943/rpsR  | 30S ribosomal protein S18                                                | 1.8 |
| BCAL1945/rpsF  | 30S ribosomal protein S6                                                 | 1.8 |
| BCAL2715/rpmG  | 50S ribosomal protein L33                                                | 1.5 |
| BCAL2765/rpsT  | 30S ribosomal protein S20                                                | 1.6 |
| BCAL2928/rpsP  | 30S ribosomal protein S16                                                | 1.6 |
| BCAL2950/rpsA  | 30S ribosomal protein S1                                                 | 1.7 |
| BCAL3347/rpsI  | 30S ribosomal protein S9                                                 | 1.6 |
| BCAL3348/rplM  | 50S ribosomal protein L13                                                | 1.7 |
| BCAL3442/rplU  | 50S ribosomal protein L21                                                | 1.6 |
| BCAL0219/tufA1 | Elongation factor Tu                                                     | 1.8 |
| BCAL0231/fusA  | Elongation factor G                                                      | 2.5 |
| BCAL0232/tuf   | Elongation factor Tu                                                     | 1.8 |
| BCAL1012/efp2  | elongation factor P                                                      | 1.9 |
| BCAL0255/infA  | translation initiation factor IF-1                                       | 2.1 |
| BCAL1507/infB  | translation initiation factor IF-2                                       | 1.8 |
| BCAL3436/proS  | prolyl-tRNA synthetase                                                   | 5.8 |
| BCAL1509       | tRNA pseudouridine synthase B                                            | 1.7 |
| BCAL1508       | ribosome-binding factor A                                                | 1.6 |
| BCAL0387       | GTP-dependent nucleic acid-binding protein EngD                          | 1.9 |
| BCAL1504       | RNA pseudouridylate synthase family protein                              | 1.6 |
| BCAM1544       | activity                                                                 | 2.0 |
| BCAM1618/infA2 | translation initiation factor IF-1                                       | 2.2 |
| BCAM1700       | Putative acetyltransferase similar to N-acetylases of ribosomal proteins | 2.0 |
| BCALr00219     | tRNA-Trp                                                                 | 1.8 |
| BCALr0164      | tRNA-Ala                                                                 | 2.0 |
| BCALr0217b     | tRNA-Ile                                                                 | 1.8 |
| BCALr0218a     | tRNA-Tyr                                                                 | 1.9 |
| BCALr0218b     | tRNA-Gly                                                                 | 1.6 |
| BCALr0218c     | tRNA-Thr                                                                 | 7.1 |

|            |          |      |
|------------|----------|------|
| BCALr0409c | tRNA-Ala | 2.3  |
| BCALr0472  | tRNA-Phe | 2.7  |
| BCALr0970a | tRNA-Asn | 5.3  |
| BCALr1551a | tRNA-Leu | 2.9  |
| BCALr1614  | tRNA-Met | 5.7  |
| BCALr1993b | tRNA-Val | 32.6 |
| BCALr2006  | tRNA-Leu | 1.8  |
| BCALr2125c | tRNA-Asp | 2.1  |
| BCALr2125e | tRNA-Asp | 1.7  |
| BCALr2145  | tRNA-Ser | 5.4  |
| BCALr2219  | tRNA-Met | 4.4  |
| BCALr2236  | tRNA-Val | 32.7 |
| BCALr2852a | tRNA-Cys | 1.6  |
| BCALr2852d | tRNA-Gly | 1.6  |
| BCALr3009b | tRNA-Arg | 1.8  |
| BCALr3016  | tRNA-Ser | 1.9  |
| BCALr3205  | tRNA-Lys | 5.7  |
| BCALr3443  | tRNA-Pro | 2.4  |
| BCAMr0918  | tRNA-Met | 1.8  |
| BCAMr1023  | tRNA-Sec | 3.9  |

### ***Motility and adherence***

|               |                                                               |     |
|---------------|---------------------------------------------------------------|-----|
| BCAL0140/flhB | Flagellar biosynthesis protein FlhB                           | 2.0 |
| BCAL0142/flhF | Flagellar biosynthesis regulator FlhF                         | 1.7 |
| BCAL0143      | Putative Flagellar biosynthesis protein                       | 2.1 |
| BCAL0520/fliK | Putative Flagellar hook-length control protein FliK           | 1.8 |
| BCAL0521/fliJ | Flagellar biosynthesis chaperone; involved in flagella export | 1.7 |
| BCAL0524/fliG | Flagellar motor switch protein G                              | 1.5 |
| BCAL0564/flgB | Flagellar basal body rod protein FlgB                         | 1.7 |
| BCAL0566/flgD | Flagellar basal body rod modification protein                 | 1.8 |
| BCAL0567/flgE | Flagellar hook protein FlgE                                   | 1.8 |
| BCAL0568/flgF | Flagellar basal body rod protein FlgF                         | 1.9 |
| BCAL0569/flgG | Flagellar basal body rod protein FlgG                         | 1.8 |

|               |                                     |      |
|---------------|-------------------------------------|------|
| BCAL0570/flgH | Flagellar basal body L-ring protein | 1.6  |
| BCAL0571/flgI | Flagellar basal body P-ring protein | 1.7  |
| BCAL3505/fliN | Flagellar motor switch protein FlhB | 1.8  |
| BCAL0140/flhB | Putative Flagellar protein FhB      | 2.41 |

### ***Protein folding and modification***

|               |                                                                                                                                                                         |     |
|---------------|-------------------------------------------------------------------------------------------------------------------------------------------------------------------------|-----|
| BCAL1997      | trigger factor; similar to proteins with peptidyl-prolyl cis-trans isomerase activity                                                                                   | 1.5 |
| BCAL2847      | Putative methionine aminopeptidase                                                                                                                                      | 1.6 |
| BCAL1025      | Putative methionine aminopeptidase                                                                                                                                      | 1.7 |
| BCAL1703      | metallo peptidase, subfamily M20D                                                                                                                                       | 2.4 |
| BCAS0397      | metallo peptidase, subfamily M20D                                                                                                                                       | 3.2 |
| BCAM0628      | Putative low molecular weight phosphotyrosine protein phosphatase                                                                                                       | 4.4 |
| BCAS0065      | Putative glutathione S-transferase                                                                                                                                      | 1.7 |
| BCAL1876/hfIC | Component of the HflK-HflC complex which is located in the outer membrane-bounded periplasmic space and that is involved in the regulation of the FstH protease complex | 1.7 |
| BCAL1877/hfIK | Component of the HflK-HflC complex which is located in the outer membrane-bounded periplasmic space and that is involved in the regulation of the FstH protease complex | 1.7 |

### ***Ion homeostasis***

#### *Iron uptake*

|                |                                                                           |     |
|----------------|---------------------------------------------------------------------------|-----|
| BCAL1697/orbJ  | ornibactin biosynthesis non-ribosomal peptide synthase                    | 1.9 |
| BCAL1698/orbK  | ornibactin biosynthesis protein                                           | 3.0 |
| BCAL1699/pvdA  | L-ornithine N(5)-oxygenase required for iron assimilation                 | 4.9 |
| BCAL1700/orbA  | ornibactin receptor precursor                                             | 5.9 |
| BCAL1701/pvdF  | ornibactin synthetase F                                                   | 4.1 |
| BCAL1702/orbL  | Putative ornibactin biosynthesis protein                                  | 3.1 |
| BCAL1371       | Putative TonB-dependent siderophore receptor                              | 1.6 |
| BCAM0564       | Putative TonB-dependent siderophore receptor                              | 1.5 |
| BCAM1571       | Putative TonB-dependent siderophore receptor                              | 1.9 |
| BCAM2626/huvA  | TonB-dependent hemoglobin/transferrin/lactoferrin receptor; heme receptor | 2.0 |
| BCAM2627/hmuS  | Putative heme degradation protein                                         | 1.7 |
| BCAL0727       | Putative magnesium chelatase subunit                                      | 1.6 |
| BCAL1622/mopII | molybdenum-pterin binding protein II                                      | 2.2 |
| BCAL2102       | Probable glutaredoxin presumed to be involved in arsenate reduction       | 1.6 |

|          |                                                                                   |     |
|----------|-----------------------------------------------------------------------------------|-----|
| BCAM0447 | Putative exported multicopper oxidase presumed to be involved in copper transport | 1.7 |
| BCAM0539 | Similar to rhodanese-related sulfurtransferases                                   | 1.7 |

### ***Replication, transcription and transcriptional regulation***

#### *Transcriptional regulators*

|               |                                                                                                                                              |     |
|---------------|----------------------------------------------------------------------------------------------------------------------------------------------|-----|
| BCAL0144/sigK | Sigma factor 70 SigK                                                                                                                         | 1.6 |
| BCAL0185      | Transcriptional regulator of the LysR family                                                                                                 | 1.6 |
| BCAL0602      | Transcriptional regulator of the MerR family                                                                                                 | 1.7 |
| BCAL0777      | Transcriptional regulator of the GntR family                                                                                                 | 2.5 |
| BCAI0914      | Putative DNA binding protein of the HipB family of regulators                                                                                | 1.9 |
| BCAL1503      | Putative transcriptional regulator protein                                                                                                   | 1.6 |
| BCAL2048      | Transcriptional regulator of the GntR family                                                                                                 | 1.7 |
| BCAL2732      | Transcriptional regulator similar to CspC which is involved in the control of stress response in <i>E. coli</i>                              | 2.6 |
| BCAL3363      | Transcriptional regulator of the TetR family                                                                                                 | 2.0 |
| BCAM0222      | Putative DNA-binding protein                                                                                                                 | 4.1 |
| BCAM0240/cciR | N-acylhomoserine lactone dependent regulatory protein                                                                                        | 1.7 |
| BCAM0514      | Transcriptional regulator of the TetR family; similar to the <i>E. coli</i> multidrug efflux regulator AcrR                                  | 1.7 |
| BCAM0552      | Putative sigma-54 dependent transcriptional regulator                                                                                        | 2.2 |
| BCAM0731      | Transcriptional regulator of the MarR family                                                                                                 | 1.5 |
| BCAM0958      | Transcriptional regulator similar to the ArsR from <i>E. coli</i> which is involved in arsenic resistance                                    | 1.6 |
| BCAM0977      | Transcriptional regulator of the AsnC family                                                                                                 | 1.8 |
| BCAM1184      | Putative transcriptional regulator of the GntR family; similar to Aro8 which is involved in the control of catabolism of aromatic aminoacids | 1.6 |
| BCAM1305      | Putative transcriptional regulator                                                                                                           | 1.6 |
| BCAM1437      | Transcriptional regulator of the MarR family                                                                                                 | 1.5 |
| BCAM1619      | Putative DNA-binding cold-shock protein; similar to CspD                                                                                     | 6.9 |
| BCAM1719      | Transcriptional regulator of the LysR family                                                                                                 | 1.5 |
| BCAM1975      | Transcriptional regulator of the AraC family                                                                                                 | 2.3 |
| BCAM1981      | Putative transcriptional regulator of the LuxR Superfamily                                                                                   | 2.0 |
| BCAM2589      | Putative transcriptional repressor of IciR family                                                                                            | 1.7 |



|                      |                                                                                                                              |      |
|----------------------|------------------------------------------------------------------------------------------------------------------------------|------|
| BCAS0115             | Transcriptional regulator of the GntR family                                                                                 | 1.7  |
| BCAS0225/shvR        | shiny variant regulator, ShvR                                                                                                | 1.5  |
| BCAS0376             | Transcriptional repressor of the GntR family                                                                                 | 1.8  |
| BCAS0380             | Transcriptional repressor of the TetR family                                                                                 | 1.6  |
| BCAS0382             | Transcriptional regulator of the AnsC family                                                                                 | 1.9  |
| BCAS0393             | Transcriptional regulator of the AraC family                                                                                 | 3.3  |
| Bcen_1449            | Transcriptional regulator of the LysR family                                                                                 | 3.5  |
| BCAL1557             | Transcriptional regulator of the GntR family; similar to FadR which is involved in the regulation of fatty acid biosynthesis | 2.0  |
| <i>Transcription</i> |                                                                                                                              |      |
| BCAL0368/cspD        | Similar to cold shock protein CspD from E. coli which is a predicted RNA chaperone                                           | 14.2 |
| BCAL0226/rpoB        | DNA-directed RNA polymerase subunit beta                                                                                     | 1.8  |
| BCAL0227/rpoC        | DNA-directed RNA polymerase subunit beta'                                                                                    | 1.7  |
| BCAL0260/rpoA        | DNA-directed RNA polymerase subunit alpha                                                                                    | 1.6  |
| BCAL1901/rho         | transcription termination factor rho                                                                                         | 1.6  |
| BCAL2117             | Putative ATP-dependent RNA helicase                                                                                          | 1.8  |
| BCAL2348/pnp         | polynucleotide phosphorylase/polyadenylase                                                                                   | 2.6  |
| <i>Replication</i>   |                                                                                                                              |      |
| BCAM1810             | Putative cold shock protein presumed to be involved in negative regulation of DNA replication                                | 6.9  |
| BCAL1944             | Putative primosomal replication protein                                                                                      | 4.7  |
| <i>Others</i>        |                                                                                                                              |      |
| BCAL0154             | Histone-like nucleoid-structuring (H-NS) protein                                                                             | 1.8  |
| BCAL2295             | Putative chromosome condensation protein                                                                                     | 2.0  |
| BCALr0914            | RNA molecule of unknown function                                                                                             | 2.1  |
| BCALr3349            | RNA molecule of unknown function                                                                                             | 1.5  |
| BCAL2888/rne1        | ribonuclease E 1                                                                                                             | 2.5  |
| BCAS0492             | Putative endoribonuclease of the L-psp family protein                                                                        | 2.2  |
| BCAL2931             | radical SAM superfamily protein; similar to photolyases involved in DNA repair                                               | 1.7  |

**Protein trafficking and secretion**

|               |                                                            |     |
|---------------|------------------------------------------------------------|-----|
| BCAL0254/secY | Preprotein translocase subunit SecY                        | 2.1 |
| BCAL0325/tatC | Sec-independent protein translocase protein TatC           | 1.6 |
| BCAL0426      | Putative inner membrane protein translocase component YidC | 1.7 |

**Signalling**

|          |                                                        |     |
|----------|--------------------------------------------------------|-----|
| BCAM0645 | Two-component regulatory system, sensor kinase protein | 1.6 |
| BCAM1705 | two-component regulatory system, sensor kinase protein | 2.4 |

**Stress-response**

|          |                              |     |
|----------|------------------------------|-----|
| BCAL1437 | Putative oxidoreductase      | 1.5 |
| BCAL1766 | Peroxiredoxin                | 1.6 |
| BCAL3418 | Putative thioredoxin protein | 1.7 |
| BCAM0181 | Putative catalase            | 4.5 |
| BCAS0437 | Predicted peroxiredoxin      | 2.2 |

**Phage-related genes**

|                  |                               |     |
|------------------|-------------------------------|-----|
| BCAL1317         | Putative phage integrase      | 1.6 |
| BCAL1519         | Putative transposase          | 1.8 |
| BCAS0553/BcepMu2 | Mu-like prophage protein gp16 | 1.9 |

**Unknown**

|          |                  |     |
|----------|------------------|-----|
| BCAL0146 |                  | 1.5 |
| BCAL0425 |                  | 1.7 |
| BCAL0440 |                  | 1.9 |
| BCAL0506 |                  | 1.6 |
| BCAL0594 |                  | 1.9 |
| BCAI0683 |                  | 2.1 |
| BCAL0765 |                  | 2.7 |
| BCAL0768 |                  | 1.6 |
| BCAL0784 |                  | 2.2 |
| BCAL1030 | Similar to pirin | 1.7 |
| BCAL1085 |                  | 1.5 |

|          |     |
|----------|-----|
| BCAL1105 | 1.9 |
| BCAL1378 | 2.0 |
| BCAL1500 | 1.7 |
| BCAL1742 | 1.5 |
| BCAL1756 | 1.5 |
| BCAL1765 | 2.5 |
| BCAL1798 | 1.5 |
| BCAL1875 | 1.8 |
| BCAL1878 | 1.9 |
| BCAL2054 | 2.0 |
| BCAL2055 | 1.5 |
| BCAL2201 | 2.0 |
| BCAL2286 | 1.8 |
| BCAL2451 | 1.7 |
| BCAL2554 | 1.8 |
| BCAL2608 | 1.6 |
| BCAL2734 | 1.5 |
| BCAL2905 | 1.7 |
| BCAL2956 | 6.3 |
| BCAL3283 | 2.6 |
| BCAM0243 | 1.8 |
| BCAM0542 | 1.8 |
| BCAM0629 | 1.5 |
| BCAM0693 | 1.6 |
| BCAM0705 | 1.5 |
| BCAM0841 | 1.7 |
| BCAM0895 | 1.6 |
| BCAM0902 | 1.6 |
| BCAM1077 | 1.7 |
| BCAM1215 | 1.7 |
| BCAM1220 | 1.9 |
| BCAM1279 | 1.8 |
| BCAM1390 | 1.8 |
| BCAM1425 | 1.5 |

|          |     |
|----------|-----|
| BCAM1677 | 1.8 |
| BCAM1811 | 2.0 |
| BCAM1987 | 1.8 |
| BCAM1991 | 1.5 |
| BCAM2002 | 1.6 |
| BCAM2527 | 1.8 |
| BCAM2647 | 5.4 |
| BCAM2676 | 1.7 |
| BCAM2685 | 1.6 |
| BCAM2717 | 1.9 |
| BCAS0137 | 1.5 |
| BCAS0290 | 1.7 |
| BCAS0296 | 1.6 |
| BCAS0315 | 1.9 |
| BCAS0344 | 1.5 |
| BCAS0394 | 3.0 |
| BCAS0413 | 1.8 |
| BCAS0414 | 3.0 |
| BCAS0463 | 1.9 |
| BCAS0596 | 1.9 |
| BCAS0750 | 2.1 |
| BCAS0755 | 1.6 |
| pBCA015  | 2.0 |
| BCAL1414 | 1.6 |
| BCAM0608 | 1.6 |
| BCAM1338 | 2.5 |
| BCAM1562 | 2.0 |
| BCAM1814 | 2.3 |
| BCAM2530 | 1.5 |
| BCAM2598 | 2.2 |
| BCAL0518 | 1.7 |
| BCAL3362 | 1.6 |
| BCAS0392 | 2.4 |
| BCAS0395 | 2.6 |

|          |     |
|----------|-----|
| BCAS0396 | 2.9 |
| BCAL2619 | 2.1 |
| BCAL2811 | 1.7 |
| BCAM0034 | 2.9 |
| BCAM1140 | 1.6 |
| BCAM2648 | 1.9 |
| BCAS0046 | 1.5 |
| BCAS0385 | 3.2 |
| BCAS0278 | 1.7 |
| BCAS0386 | 4.0 |
| BCAS0445 | 1.9 |
| BCAM1147 | 1.6 |
| BCAM0035 | 2.2 |
| BCAM1221 | 1.6 |
| BCAM2570 | 2.1 |
| BCAS0384 | 2.6 |
| BCAM0039 | 6.0 |
| BCAM2298 | 1.9 |
| BCAS0138 | 1.7 |
| BCAM1960 | 1.7 |
| BCAL3435 | 1.8 |

**Genes up-regulated in IST4113, compared to IST439, sorted by gene number**

pBCA015

Bcen\_2828

Bcen\_1449

Bcen\_1448

BCAS0755

BCAS0750

BCAS0627

BCAS0625

BCAS0596

BCAS0575

BCAS0574

BCAS0553

BCAS0497

BCAS0496

BCAS0495

BCAS0494

BCAS0492

BCAS0463

BCAS0445

BCAS0438

BCAS0437

BCAS0426

BCAS0425

BCAS0420

BCAS0419

BCAS0417

BCAS0414

BCAS0413

BCAS0397

BCAS0396

BCAS0395

BCAS0394

BCAS0393  
BCAS0392  
BCAS0391  
BCAS0390  
BCAS0389  
BCAS0388  
BCAS0386  
BCAS0385  
BCAS0384  
BCAS0383  
BCAS0382  
BCAS0381  
BCAS0380  
BCAS0376  
BCAS0346  
BCAS0344  
BCAS0343  
BCAS0342  
BCAS0341  
BCAS0340  
BCAS0315  
BCAS0305  
BCAS0296  
BCAS0290  
BCAS0278  
BCAS0225  
BCAS0211  
BCAS0138  
BCAS0137  
BCAS0136  
BCAS0122  
BCAS0115  
BCAS0114  
BCAS0113

BCAS0110  
BCAS0066  
BCAS0065  
BCAS0054  
BCAS0053  
BCAS0046  
BCAMr1023  
BCAMr0918  
BCAM2806  
BCAM2783  
BCAM2726  
BCAM2725  
BCAM2724  
BCAM2717  
BCAM2697  
BCAM2685  
BCAM2676  
BCAM2675  
BCAM2674  
BCAM2648  
BCAM2647  
BCAM2627  
BCAM2626  
BCAM2620  
BCAM2618  
BCAM2598  
BCAM2589  
BCAM2570  
BCAM2545  
BCAM2530  
BCAM2529  
BCAM2527  
BCAM2526  
BCAM2509



BCAM2316  
BCAM2304  
BCAM2302A  
BCAM2301  
BCAM2300  
BCAM2299  
BCAM2298  
BCAM2251  
BCAM2250  
BCAM2249  
BCAM2248  
BCAM2247  
BCAM2188  
BCAM2122  
BCAM2002  
BCAM1991  
BCAM1988  
BCAM1987  
BCAM1986  
BCAM1981  
BCAM1979  
BCAM1978  
BCAM1975  
BCAM1974  
BCAM1961  
BCAM1960  
BCAM1814  
BCAM1811  
BCAM1810  
BCAM1774  
BCAM1773  
BCAM1772  
BCAM1771  
BCAM1770

BCAM1761  
BCAM1719  
BCAM1705  
BCAM1704  
BCAM1700  
BCAM1678  
BCAM1677  
BCAM1676  
BCAM1619  
BCAM1618  
BCAM1588  
BCAM1582  
BCAM1571  
BCAM1566  
BCAM1565  
BCAM1564  
BCAM1563  
BCAM1562  
BCAM1560  
BCAM1544  
BCAM1455  
BCAM1449A  
BCAM1437  
BCAM1427  
BCAM1425  
BCAM1391  
BCAM1390  
BCAM1389  
BCAM1387  
BCAM1386  
BCAM1379  
BCAM1378  
BCAM1377  
BCAM1376

BCAM1338  
BCAM1315  
BCAM1305  
BCAM1286  
BCAM1279  
BCAM1221  
BCAM1220  
BCAM1219  
BCAM1215  
BCAM1184  
BCAM1151  
BCAM1147  
BCAM1140  
BCAM1126  
BCAM1125  
BCAM1124  
BCAM1123  
BCAM1122  
BCAM1121  
BCAM1077  
BCAM0978  
BCAM0977  
BCAM0976  
BCAM0958  
BCAM0902  
BCAM0895  
BCAM0841  
BCAM0811  
BCAM0810  
BCAM0746  
BCAM0731  
BCAM0712  
BCAM0705  
BCAM0693

BCAM0692  
BCAM0645  
BCAM0629  
BCAM0628  
BCAM0612  
BCAM0611  
BCAM0610  
BCAM0608  
BCAM0606  
BCAM0564  
BCAM0563  
BCAM0561  
BCAM0560  
BCAM0558  
BCAM0557  
BCAM0556  
BCAM0555  
BCAM0552  
BCAM0551  
BCAM0550  
BCAM0543  
BCAM0542  
BCAM0540  
BCAM0539  
BCAM0514  
BCAM0447  
BCAM0441  
BCAM0439  
BCAM0382  
BCAM0243  
BCAM0240  
BCAM0238  
BCAM0223  
BCAM0222

BCAM0220  
BCAM0219  
BCAM0214  
BCAM0207  
BCAM0201  
BCAM0185  
BCAM0184  
BCAM0182  
BCAM0181  
BCAM0180  
BCAM0171  
BCAM0166  
BCAM0153  
BCAM0121  
BCAM0098  
BCAM0039  
BCAM0036  
BCAM0035  
BCAM0034  
BCALr3443  
BCALr3349  
BCALr3205  
BCALr3016  
BCALr3009b  
BCALr2852d  
BCALr2852a  
BCALr2236  
BCALr2219  
BCALr2145  
BCALr2125e  
BCALr2125c  
BCALr2006  
BCALr1993b  
BCALr1614

BCALr1551a  
BCALr0970a  
BCALr0914  
BCALr0472  
BCALr0409c  
BCALr0218c  
BCALr0218b  
BCALr0218a  
BCALr0217b  
BCALr0164  
BCALr00219  
BCAL3505  
BCAL3442  
BCAL3438  
BCAL3436  
BCAL3435  
BCAL3418  
BCAL3363  
BCAL3362  
BCAL3348  
BCAL3347  
BCAL3285  
BCAL3283  
BCAL3282  
BCAL3138  
BCAL3051  
BCAL3050  
BCAL3049  
BCAL2956  
BCAL2950  
BCAL2931  
BCAL2928  
BCAL2905  
BCAL2888

BCAL2867  
BCAL2847  
BCAL2822  
BCAL2811  
BCAL2765  
BCAL2759  
BCAL2734  
BCAL2732  
BCAL2729  
BCAL2725  
BCAL2718  
BCAL2717  
BCAL2715  
BCAL2619  
BCAL2608  
BCAL2554  
BCAL2466  
BCAL2451  
BCAL2354  
BCAL2348  
BCAL230  
BCAL2295  
BCAL2286  
BCAL2244  
BCAL2241  
BCAL2240  
BCAL2224  
BCAL2201  
BCAL2180  
BCAL2166  
BCAL2146  
BCAL2122  
BCAL2117  
BCAL2102

BCAL2063  
BCAL2061  
BCAL2055  
BCAL2054  
BCAL2053  
BCAL2052  
BCAL2051  
BCAL2050  
BCAL2049  
BCAL2048  
BCAL1997  
BCAL1945  
BCAL1944  
BCAL1943  
BCAL1942  
BCAL1926  
BCAL1913  
BCAL1911  
BCAL1910  
BCAL1909  
BCAL1908  
BCAL1905  
BCAL1901  
BCAL1887  
BCAL1878  
BCAL1877  
BCAL1876  
BCAL1875  
BCAL1872  
BCAL1862  
BCAL1798  
BCAL1796  
BCAL1775  
BCAL1766



BCAL1765  
BCAL1756  
BCAL1742  
BCAL1703  
BCAL1702  
BCAL1701  
BCAL1700  
BCAL1699  
BCAL1698  
BCAL1697  
BCAL1671  
BCAL1670  
BCAL1669  
BCAL1668  
BCAL1622  
BCAL1621  
BCAL1620  
BCAL1619  
BCAL1557  
BCAL1519  
BCAL1509  
BCAL1508  
BCAL1507  
BCAL1504  
BCAL1503  
BCAL1500  
BCAL1484  
BCAL1483  
BCAL1437  
BCAL1436  
BCAL1435  
BCAL1431  
BCAL1423  
BCAL1414

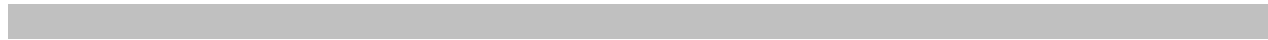

BCAL1413A  
BCAL1378  
BCAL1377  
BCAL1371  
BCAL1317  
BCAL1252  
BCAL1225  
BCAL1223  
BCAL1105  
BCAL1092  
BCAL1085  
BCAL1081  
BCAL1080  
BCAL1079  
BCAL1030  
BCAL1025  
BCAL1012  
BCAL0990  
BCAL0915  
BCAL0914  
BCAL0906  
BCAL0799  
BCAL0784  
BCAL0781  
BCAL0780  
BCAL0779  
BCAL0778  
BCAL0777  
BCAL0768  
BCAL0766  
BCAL0765  
BCAL0727  
BCAL0713  
BCAL0712

BCAL0711  
BCAI0683  
BCAL0640  
BCAL0603  
BCAL0602  
BCAL0600  
BCAL0599  
BCAL0598  
BCAL0596  
BCAL0595  
BCAL0594  
BCAL0571  
BCAL0570  
BCAL0569  
BCAL0568  
BCAL0567  
BCAL0566  
BCAL0564  
BCAL0524  
BCAL0521  
BCAL0520  
BCAL0518  
BCAL0506  
BCAL0482  
BCAL0440  
BCAL0426  
BCAL0425  
BCAL0391  
BCAL0387  
BCAL0368  
BCAL0325  
BCAL0261  
BCAL0260  
BCAL0259

BCAL0258  
BCAL0257  
BCAL0256  
BCAL0255  
BCAL0254  
BCAL0253  
BCAL0252  
BCAL0251  
BCAL0250  
BCAL0249  
BCAL0248  
BCAL0247  
BCAL0246  
BCAL0245  
BCAL0244  
BCAL0243  
BCAL0242  
BCAL0241  
BCAL0240  
BCAL0239  
BCAL0238  
BCAL0237  
BCAL0236  
BCAL0235  
BCAL0234  
BCAL0233  
BCAL0232  
BCAL0231  
BCAL0229  
BCAL0227  
BCAL0226  
BCAL0225  
BCAL0224  
BCAL0222

BCAL0219  
BCAL0206  
BCAL0204  
BCAL0185  
BCAL0159  
BCAL0154  
BCAL0151  
BCAL0146  
BCAL0144  
BCAL0143  
BCAL0142  
BCAL0140  
BCAL0140  
BCAL0115  
BCAL0110  
BCAL0075  
BCAL0074  
BCAL0073  
BCAL0055  
BCAL0037  
BCAL0030  
BCAL0019

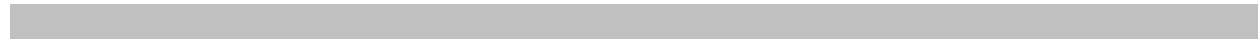

Supplement: pone.0028831.s002.pdf [file pone.0028831.s002.pdf]
