# Supplementary material for: Genomic Expression Analysis Reveals Strategies of Burkholderia cenocepacia to Adapt to Cystic Fibrosis Patients' Airways and Antimicrobial Therapy
Source: PubMed Central journal article supplement (PMC3244429; doi:10.1371/journal.pone.0028831), 2011-12-21
Supplement: pone.0028831.s001.pdf [file pone.0028831.s001.pdf]

**Supplementary Table S1. Sub-set of genes found to be differently transcribed (above or below 1.5-fold) in IST439 and IST4113.**

| CDS/Gene                                                | Function                                                                                 | <u>mRNA IST4113</u><br><u>mRNA IST439</u> |
|---------------------------------------------------------|------------------------------------------------------------------------------------------|-------------------------------------------|
| <b><u>Carbohydrate metabolism</u></b>                   |                                                                                          |                                           |
| <i>Electron transport and oxidative phosphorylation</i> |                                                                                          |                                           |
| BCAL0030/ <i>atpB</i>                                   | F <sub>0</sub> F <sub>1</sub> ATP synthase subunit A                                     | 1.7                                       |
| BCAL0037/ <i>atpC</i>                                   | F <sub>0</sub> F <sub>1</sub> ATP synthase subunit epsilon                               | 1.7                                       |
| BCAM2674                                                | Putative cytochrome oxidase subunit I                                                    | 2.7                                       |
| BCAM2675                                                | Putative cytochrome oxidase subunit II                                                   | 1.5                                       |
| BCAL0328/ <i>petA</i>                                   | Ubiquinol-cytochrome c reductase iron-sulfur subunit; involved in aerobic respiration    | -1.9                                      |
| BCAL0329/ <i>petB</i>                                   | Cytochrome <i>b</i> of the cytochrome <i>bc</i> complex; involved in aerobic respiration | -2.4                                      |
| BCAL0330/ <i>petC</i>                                   | Cytochrome <i>c1</i> precursor                                                           | -1.6                                      |
| BCAL0388                                                | Ubiquinone biosynthesis hydroxylase family protein                                       | -2.4                                      |
| BCAL0784/ <i>cydA</i>                                   | Cytochrome <i>d</i> ubiquinol oxidase subunit II (cytochrome <i>bd</i> )                 | -1.6                                      |
| BCAL0785/ <i>cydB</i>                                   | Cytochrome <i>d</i> ubiquinol oxidase subunit II (cytochrome <i>bd</i> )                 | -2.3                                      |
| BCAL2141/ <i>cyoD</i>                                   | Cytochrome <i>o</i> ubiquinol oxidase                                                    | -2.2                                      |
| BCAL2142/ <i>cyoC</i>                                   | Cytochrome <i>o</i> ubiquinol oxidase subunit III                                        | -2.1                                      |
| BCAL2143/ <i>cyoB</i>                                   | Ubiquinol oxidase polypeptide I                                                          | -2.6                                      |
| BCAL2144/ <i>cyoA</i>                                   | Ubiquinol oxidase polypeptide II precursor                                               | -2.3                                      |
| <i>Glyoxylate cycle</i>                                 |                                                                                          |                                           |
| BCAL2122/ <i>aceB</i>                                   | Malate synthase                                                                          | 1.6                                       |
| BCAM1588                                                | Isocitrate lyase                                                                         | 2.3                                       |
| <i>Acetoin catabolism</i>                               |                                                                                          |                                           |
| BCAL1909/ <i>acoC</i>                                   | Branched-chain alpha-keto acid dehydrogenase subunit E2                                  | 4.8                                       |
| BCAL1910/ <i>acoB</i>                                   | Acetoin:2,6-dichlorophenolindophenol oxidoreductase beta subunit                         | 1.8                                       |
| BCAL1911/ <i>acoA</i>                                   | Acetoin:2,6-dichlorophenolindophenol oxidoreductase alpha subunit                        | 2.5                                       |
| BCAL1913/ <i>acoX</i>                                   | Acetoin catabolism protein                                                               | 3.6                                       |
| <b><u>Amino acid and nitrogen metabolism</u></b>        |                                                                                          |                                           |
| <i>Ammonium metabolism</i>                              |                                                                                          |                                           |
| BCAL2224/ <i>glnA</i>                                   | Glutamine synthetase; involved in ammonium reduction                                     | 1.6                                       |
| BCAM2301                                                | Putative methylamine dehydrogenase;                                                      | 2.3                                       |
| BCAM2302A                                               | Putative methylamine utilization protein                                                 | 2.2                                       |
| BCAS0114                                                | Putative histidine-ammonia lyase                                                         | 1.5                                       |
| BCAM2304                                                | Putative methylamine dehydrogenase                                                       | 1.9                                       |

| CDS/Gene                                             | Function                                                                                                         | <u>mRNA IST4113</u><br>mRNA IST439 |
|------------------------------------------------------|------------------------------------------------------------------------------------------------------------------|------------------------------------|
| <i>Glycine catabolism</i>                            |                                                                                                                  |                                    |
| BCAL0075/ <i>gcvT</i>                                | Glycine cleavage system aminomethyltransferase T; involved in ammonium reduction                                 | 2.4                                |
| BCAL0073/ <i>gcvP</i>                                | Glycine dehydrogenase                                                                                            | 2.0                                |
| BCAL0074/ <i>gcvH</i>                                | Glycine cleavage system protein H                                                                                | 2.7                                |
| <i>Histidine catabolism</i>                          |                                                                                                                  |                                    |
| BCAL2240/ <i>hutG</i>                                | N-formylglutamate deformylase                                                                                    | 1.9                                |
| BCAL2241                                             | N-formimino-L-glutamate deiminase                                                                                | 1.5                                |
| BCAL2244/ <i>hutU</i>                                | Urocanate hydratase                                                                                              | 1.5                                |
| <i>Aspartate, glutamate and glutamine catabolism</i> |                                                                                                                  |                                    |
| BCAL2146/ <i>argT</i>                                | Argininosuccinate synthase involved in arginine biosynthesis                                                     | 1.5                                |
| BCAM0746/ <i>ask</i>                                 | Aspartate kinase                                                                                                 | 2.9                                |
| BCAL0600                                             | Putative glutamine synthetase                                                                                    | 2.4                                |
| <i>Phenylalanine catabolism</i>                      |                                                                                                                  |                                    |
| BCAM0810                                             | Putative aromatic oxygenase                                                                                      | 1.5                                |
| BCAM0811                                             | Putative aromatic oxygenase                                                                                      | 1.7                                |
| BCAM1315/ <i>amiE</i>                                | Acylamide amidohydrolase; involved in putrescine biosynthesis                                                    | 2.7                                |
| BCA1979/ <i>feaB</i>                                 | Phenylacetaldehyde dehydrogenase                                                                                 | 1.5                                |
| <i>Sulphur metabolism</i>                            |                                                                                                                  |                                    |
| BCAM1121                                             | Putative taurine dioxygenase                                                                                     | 3.7                                |
| BCAM1122                                             | Putative taurine dioxygenase                                                                                     | 4.1                                |
| BCAM1676                                             | Putative nitrite/sulfite reductase that reduces sulfite into H <sub>2</sub> S; involved in cysteine biosynthesis | 1.6                                |
| BCAM1391                                             | Putative alkanesulfonate monooxygenase which convert alkanesulfonates into sulfite                               | 1.6                                |
| BCAM1565                                             | Putative alkanesulfonate monooxygenases                                                                          | 1.9                                |
| BCAL1619/ <i>ssuD</i>                                | Putative alkanesulfonate monooxygenases                                                                          | 1.7                                |
| BCAM0557                                             | Putative alkanesulfonate monooxygenases                                                                          | 3.4                                |
| BCAS0054                                             | Putative alkanesulfonate monooxygenases                                                                          | 4.5                                |
| BCAL2049                                             | Putative oxidoreductase presumed to be involved in conversion of adenylnylsulfate into sulfite                   | 1.8                                |
| BCAL2681/ <i>cysN</i>                                | Putative sulfate adenylyltransferase subunit 1                                                                   | -1.6                               |
| BCAL2682/ <i>cysDI</i>                               | Sulfate adenylyltransferase subunit 2                                                                            | -1.8                               |
| BCAL2683/ <i>cysH</i>                                | Phosphoadenosine phosphosulfate reductase                                                                        | -1.5                               |

| CDS/Gene                        | Function                                                                                            | <u>mRNA IST4113</u><br><u>mRNA IST439</u> |
|---------------------------------|-----------------------------------------------------------------------------------------------------|-------------------------------------------|
| <b><i>Transport</i></b>         |                                                                                                     |                                           |
| <i>Sulphur-based compounds</i>  |                                                                                                     |                                           |
| BCAL0711/ <i>tauA</i>           | Periplasmic component of the ABC taurine transporter<br>TauABC                                      | 3.2                                       |
| BCAL0712/ <i>tauB</i>           | ATPase component of the ABC taurine transporter<br>TauABC                                           | 2.2                                       |
| BCAL0713/ <i>tauC</i>           | Permease component of taurine ABC transporter<br>TauABC                                             | 2.5                                       |
| BCAL1620/ <i>ssuC</i>           | Permease component of the ABC transporter SsuABC<br>required for uptake of aliphatic sulfonates     | 1.8                                       |
| BCAL1621/ <i>ssuB</i>           | ATPase component of of the ABC transporter<br>SsuABC required for uptake of aliphatic sulfonates    | 1.7                                       |
| <i>Sugars</i>                   |                                                                                                     |                                           |
| BCAL1377                        | H <sup>+</sup> /citrate symporter                                                                   | 1.8                                       |
| BCAL1431                        | Putative outer membrane component of an ABC<br>transport system required for ribose uptake          | 1.8                                       |
| BCAL0781                        | Phosphotransferase system IIC components; specific<br>for glucose/maltose/N-acetylglucosamine       | 3.2                                       |
| BCAL1092                        | Periplasmic component of a ABC transporter similar<br>to a 2-aminoethylphosphonate transport system | 1.7                                       |
| BCAM0153/ <i>kgdT</i>           | 2-keto-3-deoxygluconate permease                                                                    | 1.8                                       |
| BCAM2509                        | Putative fucose transporter                                                                         | 1.6                                       |
| BCAM1986                        | Putative sugar transporter of the Major Facilitator<br>Superfamily                                  | 1.9                                       |
| BCAM2545                        | Putative sugar transporter of the Major Facilitator<br>Superfamily                                  | 2.5                                       |
| BCAM2697                        | Putative sugar transporter of the Major Facilitator<br>Superfamily                                  | 2.1                                       |
| BCAS0122                        | Putative sugar transporter of the Major Facilitator<br>Superfamily                                  | 1.6                                       |
| BCAS0343                        | Putative sugar transporter of the Major Facilitator<br>Superfamily                                  | 1.8                                       |
| BCAS0438                        | Predicted periplasmic component of an ABC sugar<br>transporter                                      | 1.9                                       |
| <i>Amino acids and peptides</i> |                                                                                                     |                                           |
| BCAM0978/ <i>lysP</i>           | Lysine-specific permease                                                                            | 1.7                                       |
| BCAL1668                        | Predicted periplasmic component of a putative<br>arginine/ornithine/lysine ABC transporter          | 1.9                                       |
| BCAL0766                        | Putative branched-chain amino acid transport system<br>permease protein                             | 2.0                                       |
| BCAL1252                        | Putative proline/betaine transporter                                                                | 2.2                                       |
| BCAL2729                        | Putative amino acid permease predicted to be involved<br>in uptake of GABA                          | 1.9                                       |
| BCAM2248/ <i>livG</i>           | ATPase component of a leucine/isoleucine/valine<br>amino acid ABC transporter                       | 2.0                                       |

| CDS/Gene                                         | Function                                                                                                                                     | <u>mRNA IST4113</u><br>mRNA IST439 |
|--------------------------------------------------|----------------------------------------------------------------------------------------------------------------------------------------------|------------------------------------|
| BCAM2249/ <i>livM</i>                            | Permease component of a leucine/isoleucine/valine amino acid ABC transporter                                                                 | 1.9                                |
| BCAM2618/ <i>argT</i>                            | Periplasmic component of a putative arginine/ornithine/lysine ABC transporter                                                                | 1.9                                |
| BCAM2724/ <i>oppF</i>                            | ATPase component of Putative oligopeptide ABC transporter                                                                                    | 1.8                                |
| BCAM2725/ <i>oppD</i>                            | ATPase component of Putative oligopeptide ABC transporter                                                                                    | 2.0                                |
| BCAM2726/ <i>oppC</i>                            | Permease component of Putative oligopeptide ABC transporter                                                                                  | 1.7                                |
| BCAS0110                                         | Predicted periplasmic component of a putative arginine/ornithine/lysine ABC transporter                                                      | 1.6                                |
| <b><i>Cell envelope and outer membrane</i></b>   |                                                                                                                                              |                                    |
| <b><i>LPS and peptidoglycan biosynthesis</i></b> |                                                                                                                                              |                                    |
| BCAL2180                                         | 3-deoxy-8-phosphooctulonate synthase presumed to be involved in synthesis of 3-deoxy-D-manno-octulosonic acid; required for LPS biosynthesis | 1.5                                |
| BCAL0779                                         | Putative phosphosugar-binding protein presumed to be involved in peptidoglycan synthesis                                                     | 3.4                                |
| BCAL2759                                         | Tetraacyldisaccharide-1-P-kinase involved in lipid A biosynthesis                                                                            | 2.3                                |
| BCAM0214                                         | Putative glycosyltransferase presumed to be involved in LPS biosynthesis                                                                     | 2.9                                |
| BCAM0220                                         | Putative outer membrane protein presumed to be involved in the secretion of peptidoglycan-associated (lipo)proteins                          | 2.3                                |
| BCAL0067                                         | ADP-heptose:LPS heptosyltransferase                                                                                                          | -1.6                               |
| BCAL2205                                         | D-alanyl-D-alanine endopeptidase (penicillin-binding protein precursor)                                                                      | -1.6                               |
| BCAL3110/ <i>waaA</i>                            | 3-deoxy-D-manno-octulosonic-acid transferase involved in biosynthesis of O-antigen                                                           | -1.6                               |
| BCAL3111/ <i>wbxY</i>                            | Protein of unknown function that is involved in biosynthesis of O-antigen                                                                    | -1.6                               |
| BCAM2067/ <i>uppS</i>                            | Putative undecaprenyl pyrophosphate synthetase involved in peptidoglycan biosynthesis                                                        | -3.7                               |
| <b><i>Protein secretion</i></b>                  |                                                                                                                                              |                                    |
| BCAL1671                                         | Metallo peptidase                                                                                                                            | 2.5                                |
| BCAM0180                                         | Metallo peptidase                                                                                                                            | 3.3                                |
| BCAL2466/ <i>eco</i>                             | Serine-protease inhibitor ecotin                                                                                                             | 1.8                                |
| BCAL2867/ <i>lepA</i>                            | GTP-binding protein that functions as an exoprotease                                                                                         | 1.5                                |
| BCAM0550                                         | Putative exported lipase                                                                                                                     | 1.9                                |
| <b><i>Adhesion</i></b>                           |                                                                                                                                              |                                    |
| BCAM0184/ <i>bclB</i>                            | Lectin; required for attachment to mucin                                                                                                     | 1.7                                |

| CDS/Gene                        | Function                                                | mRNA IST4113<br>mRNA IST439 |
|---------------------------------|---------------------------------------------------------|-----------------------------|
| BCAM0185/ <i>bclC</i>           | Lectin; required for attachment to mucin                | 1.5                         |
| BCAM0219                        | Putative haemagglutinin-related autotransporter protein | 1.5                         |
| BCAM0223                        | Putative haemagglutinin-related autotransporter protein | 3.8                         |
| BCAL1086/ <i>bclA</i>           | Lectin; required for attachment to mucin                | -2.1                        |
| BCAM0224                        | Putative haemagglutinin autotransporter protein         | -1.6                        |
| <b><u>Protein synthesis</u></b> |                                                         |                             |
| BCAL0115/ <i>rpsU1</i>          | Structural component of the ribosome                    | 2.0                         |
| BCAL0222/ <i>rplK</i>           | 50S ribosomal protein L11                               | 1.7                         |
| BCAL0224/ <i>rplJ</i>           | 50S ribosomal protein L10                               | 2.2                         |
| BCAL0225/ <i>rplL</i>           | 50S ribosomal protein L7/L12                            | 2.4                         |
| BCAL0229/ <i>rpsL</i>           | 30S ribosomal protein S12                               | 1.9                         |
| BCAL230/ <i>rpsG</i>            | 30S ribosomal protein S12                               | 1.8                         |
| BCAL0233/ <i>rpsJ</i>           | 30s ribosomal protein S10                               | 1.6                         |
| BCAL0234/ <i>rplC</i>           | 50S ribosomal protein L3                                | 2.3                         |
| BCAL0235/ <i>rplD</i>           | 50S ribosomal protein L4                                | 2.8                         |
| BCAL0236/ <i>rplW</i>           | 50S ribosomal protein L23                               | 2.5                         |
| BCAL0237/ <i>rplB</i>           | 50S ribosomal protein L2                                | 2.9                         |
| BCAL0238/ <i>rpsS</i>           | 30S ribosomal protein S19                               | 2.7                         |
| BCAL0239/ <i>rplV</i>           | 50S ribosomal protein L22                               | 2.8                         |
| BCAL0240/ <i>rpsC</i>           | 30S ribosomal protein S3                                | 2.9                         |
| BCAL0241/ <i>rplP</i>           | 50S ribosomal protein L16                               | 2.0                         |
| BCAL0242/ <i>rpmC</i>           | 50S ribosomal protein L29                               | 2.3                         |
| BCAL0243/ <i>rpsQ</i>           | 30S ribosomal protein S17                               | 2.6                         |
| BCAL0244/ <i>rplN</i>           | 50S ribosomal protein L14                               | 1.8                         |
| BCAL0245/ <i>rplX</i>           | 50S ribosomal protein L24                               | 1.5                         |
| BCAL0246/ <i>rplE</i>           | 50S ribosomal protein L5                                | 1.8                         |
| BCAL0247/ <i>rpsN</i>           | 30S ribosomal protein S14                               | 2.2                         |
| BCAL0248/ <i>rpsH</i>           | 30S ribosomal protein S8                                | 2.1                         |
| BCAL0249/ <i>rplF</i>           | 50S ribosomal protein L6                                | 1.9                         |
| BCAL0250/ <i>rplR</i>           | 50S ribosomal protein L18                               | 2.1                         |
| BCAL0251/ <i>rpsE</i>           | 30S ribosomal protein S5                                | 1.9                         |
| BCAL0252/ <i>rpmD</i>           | 50S ribosomal protein L30                               | 1.7                         |
| BCAL0253/ <i>rplO</i>           | 50S ribosomal protein L15                               | 1.9                         |
| BCAL0256/ <i>rpmJ</i>           | 50S ribosomal protein L36                               | 1.8                         |
| BCAL0257/ <i>rpsM</i>           | 30S ribosomal protein S13                               | 1.9                         |
| BCAL0258/ <i>rpsK</i>           | 30S ribosomal protein S11                               | 2.2                         |
| BCAL0259/ <i>rpsD</i>           | 30S ribosomal protein S4                                | 1.7                         |
| BCAL0261/ <i>rplQ</i>           | 50S ribosomal protein L17                               | 1.5                         |
| BCAL0799                        | 50S ribosomal protein L25/general stress protein Ctc    | 1.9                         |
| BCAL0990/ <i>rpmF</i>           | 50S ribosomal protein L32                               | 1.9                         |
| BCAL1483/ <i>rpmI</i>           | 50S ribosomal protein L35                               | 2.3                         |
| BCAL1484/ <i>rpiT</i>           | 50S ribosomal protein L20                               | 2.2                         |
| BCAL1905/ <i>rpmE2</i>          | 50S ribosomal protein L31 type B                        | 2.7                         |
| BCAL1942/ <i>rplI</i>           | 50S ribosomal protein L9                                | 2.0                         |

|                        |                                    |     |
|------------------------|------------------------------------|-----|
| BCAL1943/ <i>rpsR</i>  | 30S ribosomal protein S18          | 1.8 |
| BCAL1945/ <i>rpsF</i>  | 30S ribosomal protein S6           | 1.8 |
| BCAL2715/ <i>rpmG</i>  | 50S ribosomal protein L33          | 1.5 |
| BCAL2765/ <i>rpsT</i>  | 30S ribosomal protein S20          | 1.6 |
| BCAL2928/ <i>rpsP</i>  | 30S ribosomal protein S16          | 1.6 |
| BCAL2950/ <i>rpsA</i>  | 30S ribosomal protein S1           | 1.7 |
| BCAL3347/ <i>rpsI</i>  | 30S ribosomal protein S9           | 1.6 |
| BCAL3348/ <i>rplM</i>  | 50S ribosomal protein L13          | 1.7 |
| BCAL3442/ <i>rplU</i>  | 50S ribosomal protein L21          | 1.6 |
| BCAL0219/ <i>tufA1</i> | Elongation factor Tu               | 1.8 |
| BCAL0231/ <i>fusA</i>  | Elongation factor G                | 2.5 |
| BCAL0232/ <i>tuf</i>   | Elongation factor Tu               | 1.8 |
| BCA11012/ <i>efp2</i>  | Elongation factor P                | 1.9 |
| BCAL0255/ <i>infA</i>  | Translation initiation factor IF-1 | 2.1 |
| BCAL1507/ <i>infB</i>  | Translation initiation factor IF-2 | 1.8 |

### **Ion homeostasis**

#### *Iron assimilation*

|                       |                                                                                        |      |
|-----------------------|----------------------------------------------------------------------------------------|------|
| BCAL1697/ <i>orbJ</i> | Non-ribosomal peptide synthase required for ornibactin biosynthesis                    | 1.9  |
| BCAL1698/ <i>orbK</i> | Protein of unknown function involved in ornibactin biosynthesis                        | 3.0  |
| BCAL1699/ <i>pvdA</i> | L-ornithine-oxygenase involved in ornibactin biosynthesis                              | 4.9  |
| BCAL1700/ <i>orbA</i> | Ornibactin receptor; presumably involved in the transport of iron-ornibactin complexes | 5.9  |
| BCAL1701/ <i>orbF</i> | Ornibactin synthetase                                                                  | 4.1  |
| BCAL1702/ <i>orbL</i> | Protein of unknown function involved in ornibactin biosynthesis                        | 3.1  |
| BCAM2626/ <i>huvA</i> | Putative heme receptor protein                                                         | 2.0  |
| BCAM2627/ <i>hmuS</i> | Putative heme ABC transport system protein                                             | 1.7  |
| BCAM0564              | TonB-dependent receptor                                                                | 1.5  |
| BCAL1371              | TonB-dependent receptor                                                                | 1.6  |
| BCAM1571              | TonB-dependent receptor                                                                | 1.9  |
| BCAM2227/ <i>phcG</i> | Putative pyochelin biosynthetic protein                                                | -1.6 |
| BCAM2230/ <i>phcE</i> | Dihydroaeruginic acid synthetase PchE involved in pyochelin biosynthesis               | -1.5 |
