# Supplementary material for: Genomic Expression Analysis Reveals Strategies of Burkholderia cenocepacia to Adapt to Cystic Fibrosis Patients' Airways and Antimicrobial Therapy
Source: PubMed Central journal article supplement (PMC3244429; doi:10.1371/journal.pone.0028831), 2011-12-21
Supplement: pone.0028831.s003.pdf [file pone.0028831.s003.pdf]

**Table S2 - List of genes down-regulated (above 1.5-fold) in *B. cenocepacia* IST4113, compared to IST439.** The genes whose transcript level in the *B. cenocepacia* IST4113 variant were at least 1.5-fold lower than the levels attained in IST439 were selected. The description of gene function is based on the information available in the "Burkholderia Genome Database" and in "KEEG pathways" database and the functional clustering was performed using the functional classes shown in Figure 1. Genes specific of the AU1054 strain are shaded in grey

| <b>Gene/ORF</b>                                         | <b>Function</b>                                                                       | <b><u>mRNA IST4113</u><br/><u>mRNA IST439</u></b> |
|---------------------------------------------------------|---------------------------------------------------------------------------------------|---------------------------------------------------|
| <b><i>Carbohydrate metabolism</i></b>                   |                                                                                       |                                                   |
| <i>Electron transport and oxidative phosphorylation</i> |                                                                                       |                                                   |
| BCAL0328/petA                                           | Ubiquinol-cytochrome c reductase iron-sulfur subunit; involved in aerobic respiration | -1.9                                              |
| BCAL0329/petB                                           | Cytochrome b of the cytochrome <i>bc</i> complex; involved in aerobic respiration     | -2.4                                              |
| BCAL0330/petC                                           | Cytochrome c1 precursor                                                               | -1.6                                              |
| BCAL0388                                                | Ubiquinone biosynthesis hydroxylase family protein                                    | -2.4                                              |
| BCAL0784/cydA                                           | Cytochrome d ubiquinol oxidase subunit II (cytochrome <i>bd</i> )                     | -1.6                                              |
| BCAL0785/cydB                                           | Cytochrome d ubiquinol oxidase subunit II (cytochrome <i>bd</i> )                     | -2.3                                              |
| BCAL2141/cyoD                                           | Cytochrome O ubiquinol oxidase protein                                                | -2.2                                              |
| BCAL2142/cyoC                                           | Cytochrome o ubiquinol oxidase subunit III                                            | -2.1                                              |
| BCAL2143/cyoB                                           | Ubiquinol oxidase polypeptide I                                                       | -2.6                                              |
| BCAL2144/cyoA                                           | Ubiquinol oxidase polypeptide II precursor                                            | -2.3                                              |
| BCAL2472                                                | Alpha, alpha-trehalose-phosphate synthase                                             | -1.9                                              |
| BCAL2680                                                | Uroporphyrin-III C-methyltransferase; involved in heme biosynthesis                   | -1.5                                              |
| BCAL2899                                                | 4Fe-4S ferredoxin                                                                     | -1.7                                              |
| BCAL3296                                                | 4-hydroxybenzoate octaprenyltransferase involved in ubiquinone biosynthesis           | -1.9                                              |
| BCAM0946                                                | Putative cytochrome b561                                                              | -2.0                                              |
| BCAM1734                                                | Predicted gluconate dehydrogenase                                                     | -1.6                                              |
| BCAM2319                                                | Iron-sulphur Rieske protein                                                           | -1.7                                              |
| BCAM2591                                                | Putative cytochrome P450 iron-sulfur protein                                          | -2.2                                              |

### *Krebs cycle*

|               |                                                                                                           |      |
|---------------|-----------------------------------------------------------------------------------------------------------|------|
| BCAL2746      | Putative citrate synthase                                                                                 | -1.9 |
| BCAM0962      | 2-methylcitrate dehydratase                                                                               | -1.5 |
| BCAM0964      | Putative lyase involved that converts citrate into oxaloacetate                                           | -2.0 |
| BCAM0965/mdh  | Malate dehydrogenase                                                                                      | -1.9 |
| BCAM1833/acnB | Bifunctional aconitate hydratase 2/2-methylisocitrate dehydratase                                         | -2.8 |
| BCAS0023      | Aldolase/citrate lyase family protein predicted to be involved in conversion of citrate into oxaloacetate | -1.6 |
| BCAM2607      | Putative NADH:flavin oxidoreductase/NADH oxidase                                                          | -1.6 |

### *Phenylacetate degradation*

|               |                                                                   |      |
|---------------|-------------------------------------------------------------------|------|
| BCAL0212/paaD | Phenylacetic acid degradation protein PaaD                        | -1.7 |
| BCAL0213/paaC | Phenylacetic acid degradation protein PaaC                        | -1.6 |
| BCAL0404/paaK | Phenylacetate-coenzyme A ligase                                   | -2.2 |
| BCAL0405/paaI | Phenylacetic acid degradation protein                             | -2.2 |
| BCAL0406/paaG | Enoyl-CoA hydratase involved in phenylacetate degradation         | -2.0 |
| BCAL0407/paaF | Beta-ketoacyl CoA thiolase involved in phenylacetate degradation  | -1.9 |
| BCAL0408/paaZ | Putative phenylacetic acid degradation oxidoreductase             | -2.4 |
| BCAM2568      | Beta-ketoacyl CoA thiolase; involved in phenylacetate degradation | -1.8 |

### *Biosynthesis of vitamins and coenzymes*

|               |                                                                                                                                               |      |
|---------------|-----------------------------------------------------------------------------------------------------------------------------------------------|------|
| BCAL0503      | Involved in biosynthesis of vitamin B12                                                                                                       | -1.6 |
| BCAL1047/pdxY | Pyridoxamine kinase involved in biosynthesis of vitamin B12                                                                                   | -1.6 |
| BCAL3276/ppnK | NAD(+)/NADH kinase family protein                                                                                                             | -1.7 |
| BCAM0138      | Phosphoglycerate mutase family protein; predicted to be involved in vitamin B12 biosynthesis                                                  | -1.6 |
| BCAM2080      | Bifunctional nicotinamide mononucleotide adenylyltransferase/ADP-ribose pyrophosphatase involved in NAD <sup>+</sup> biosynthesis/degradation | -1.7 |
| BCAS0253      | 2-dehydropantoate 2-reductase involved in pantothenate biosynthesis                                                                           | -1.7 |

### *Metabolism of ketone bodies*

|               |                                                                                                                  |      |
|---------------|------------------------------------------------------------------------------------------------------------------|------|
| BCAL1472/scoA | Succinyl-CoA:3-ketoacid-coenzyme A transferase subunit A; involved in synthesis and degradation of ketone bodies | -1.6 |
|---------------|------------------------------------------------------------------------------------------------------------------|------|

|                |                                                                                                                  |      |
|----------------|------------------------------------------------------------------------------------------------------------------|------|
| BCAL1473/scoB  | Succinyl-CoA:3-ketoacid-coenzyme A transferase subunit B; involved in synthesis and degradation of ketone bodies | -1.6 |
| BCAM0023/adc   | Acetoacetate decarboxylase involved in degradation of ketone bodies                                              | -1.6 |
| <i>Others</i>  |                                                                                                                  |      |
| BCAM2791       | Feruloyl-CoA synthase involved in ferulic acid metabolism                                                        | -2.0 |
| BCAL0064       | Acetaldehyde dehydrogenase                                                                                       | -1.7 |
| BCAL0476       | HpcH/HpaI aldolase/citrate lyase family protein involved in biosynthesis of tartronate semialdehyde              | -1.6 |
| BCAL0536/fpr   | Ferredoxin-NADP reductase                                                                                        | -1.6 |
| BCAL1390/bcsZ  | Endo-1,4-D-glucanase                                                                                             | -1.8 |
| BCAL2041/hyuE  | Hydantoin racemase                                                                                               | -1.9 |
| BCAL2206       | Phasin-like protein; predicted to be involved in metabolism of PHAs                                              | -3.0 |
| BCAL3379       | Ureidoglycolate hydrolase                                                                                        | -2.1 |
| BCAL3380       | Allantoicase                                                                                                     | -1.9 |
| BCAM1570       | Alcohol dehydrogenase                                                                                            | -8.3 |
| BCAM2343/betaA | Choline dehydrogenase                                                                                            | -1.5 |
| BCAM2710       | Putative acetyl-CoA synthetase involved in formation of acetyl-CoA from acetate                                  | -2.5 |
| BCAS0034       | Metallo-beta-lactamase superfamily protein                                                                       | -1.8 |
| BCAM1430       | Metallo-beta-lactamase superfamily protein                                                                       | -1.6 |
| BCAS0320       | Isoquinoline 1-oxidoreductase alpha subunit                                                                      | -2.3 |
| BCAM1734       | Predicted gluconate dehydrogenase                                                                                | -1.6 |

## **Aminoacid and nitrogen metabolism**

### *Histidine biosynthesis*

|               |                                                                                                                                         |      |
|---------------|-----------------------------------------------------------------------------------------------------------------------------------------|------|
| BCAL0317/hisA | 1-(5-phosphoribosyl)-5-[(5- phosphoribosylamino)methylideneamino] imidazole-4-carboxamide isomerase; involved in histidine biosynthesis | -1.8 |
| BCAL0319/hisI | Phosphoribosyl-AMP cyclohydrolase                                                                                                       | -1.6 |

### *Polyamine biosynthesis*

|                |                                                                                   |      |
|----------------|-----------------------------------------------------------------------------------|------|
| BCAM0416/Agmat | Putative agmatinase involved in spermidine biosynthesis                           | -1.6 |
| BCAM0592       | Putative orthinine cyclodeaminase involved in proline biosynthesis from ornithine | -1.5 |

|                                               |                                                                                                              |      |
|-----------------------------------------------|--------------------------------------------------------------------------------------------------------------|------|
| BCAM1111                                      | Ornithine decarboxylase involved in conversion of ornithine into putrescine                                  | -1.8 |
| BCAM1112                                      | Arginine decarboxylase involved in conversion of arginine into agmatine; involved in polyamine biosynthesis  | -1.5 |
| BCAL3390                                      | Spermidine synthase                                                                                          | -1.6 |
| <i>Leucine, valine and alanine metabolism</i> |                                                                                                              |      |
| BCAL0068                                      | Thiamine pyrophosphate protein; involved in leucine and valine biosynthesis                                  | -1.7 |
| BCAM2430                                      | Putative biotin carboxylase involved in valine/leucine/isoleucine degradation                                | -1.7 |
| BCAM2431                                      | Enoyl-CoA hydratase; involved in valine/leucine/isoleucine degradation                                       | -1.5 |
| BCAM2432                                      | Putative biotin-dependent carboxyl transferase carboxylase involved in valine/leucine/isoleucine degradation | -1.7 |
| BCAM2433                                      | Putative acyl-CoA dehydrogenase; involved in valine/leucine/isoleucine degradation                           | -1.6 |
| <i>Tryptophan metabolism</i>                  |                                                                                                              |      |
| BCAL0398/trpG                                 | Anthranilate synthase component II; involved in tryptophan biosynthesis                                      | -1.5 |
| BCAL2441                                      | Chorismate lyase; involved in biosynthesis of aromatic aminoacids                                            | -2.1 |
| BCAL2791                                      | Putative kynureninase involved in tryptophan catabolism                                                      | -1.8 |
| BCAL2792                                      | Putative tryptophan 2,3-dioxygenase                                                                          | -1.7 |
| <i>Others</i>                                 |                                                                                                              |      |
| BCAL0460                                      | into 3-phosphohydroxypyruvate in the biosynthesis of serine                                                  | -1.5 |
| BCAL2352                                      | Putative carbonic anhydrase                                                                                  | -1.5 |
| BCAL3107/ureE                                 | Urease accessory protein; involved in urea catabolism                                                        | -1.6 |
| BCAL3359                                      | Putative glutamate dehydrogenase                                                                             | -2.2 |
| BCAL0042/putA                                 | Proline dehydrogenase/pyrroline-5-carboxylate dehydrogenase                                                  | -1.9 |
| BCAM1353/ald                                  | Alanine dehydrogenase involved in conversion of alanine into pyruvate                                        | -2.3 |
| BCAM2176/gsa                                  | Glutaminase involved in conversion of glutamine into glutamate                                               | -1.5 |
| BCAM2326/glyA                                 | Serine hydroxymethyltransferase                                                                              | -2.0 |
| BCAM2392/sdaB                                 | Putative L-serine dehydratase involved in conversion of pyruvate into serine                                 | -1.5 |
| BCAM2325                                      | Putative dipeptidase                                                                                         | -1.9 |

**Purine and pyrimidine metabolism**

|          |                                                                                         |      |
|----------|-----------------------------------------------------------------------------------------|------|
| BCAL1975 | Putative diguanylate cyclase                                                            | -1.6 |
| BCAL3428 | Ribonucleotide-diphosphate reductase subunit beta involved in conversion of GDP to dGDP | -1.9 |
| BCAM2006 | Aspartate carbamoyltransferase involved in pyrimidine biosynthesis                      | -1.9 |
| BCAM2822 | Putative diguanylate cyclase; involved in c-diGMP biosynthesis                          | -1.6 |

**Lipid metabolism**

|               |                                                                                                  |      |
|---------------|--------------------------------------------------------------------------------------------------|------|
| BCAL0046      | Putative fatty-acid CoA ligase                                                                   | -1.5 |
| BCAL0047      | Putative acyl-CoA dehydrogenase                                                                  | -1.8 |
| BCAL1046/plcN | Putative non-hemolytic phospholipase C                                                           | -1.7 |
| BCAM0408      | Putative phospholipase C                                                                         | -2.2 |
| BCAL1247      | Similar to phosphatidylserine/phosphatidylglycerophosphate/cardiolipin synthases                 | -2.2 |
| BCAL1249      | Putative poly-beta-hydroxyalkanoate depolymerase depolymerase                                    | -3.1 |
| BCAL2690      | Short chain dehydrogenase; predicted to have 3-oxoacyl-[acyl-carrier-protein] reductase activity | -2.0 |
| BCAL2783      | Putative cyclopropane-fatty-acyl-phospholipid synthase                                           | -2.1 |
| BCAL3191      | Putative glutaryl-CoA dehydrogenase                                                              | -1.9 |
| BCAM0254      | Putative acyl carrier protein                                                                    | -1.5 |
| BCAM0774      | Poly[D-(-)-3-hydroxybutyrate] depolymerase                                                       | -1.6 |
| BCAM2340/phaG | Putative (R)-3-hydroxydecanoyl-ACP:CoA transacylase                                              | -1.8 |

**Sulphur metabolism**

|                |                                                |      |
|----------------|------------------------------------------------|------|
| BCAL2681/cysN  | Putative sulfate adenylyltransferase subunit 1 | -1.6 |
| BCAL2682/cysD1 | Sulfate adenylyltransferase subunit 2          | -1.8 |
| BCAL2683/cysH  | Phosphoadenosine phosphosulfate reductase      | -1.5 |

**Transport***Sugars*

|          |                                                                                                       |      |
|----------|-------------------------------------------------------------------------------------------------------|------|
| BCAL0282 | Periplasmic component of an ABC transporter presumed to be involved in glycerol-3-phosphate transport | -1.8 |
| BCAL0283 | Permease component of an ABC transporter presumed to be involved in glycerol-3-phosphate transport    | -1.8 |

|                                  |                                                                                         |      |
|----------------------------------|-----------------------------------------------------------------------------------------|------|
| BCAL0543                         | Major Facilitator Superfamily protein similar to sugar efflux permeases                 | -1.8 |
| BCAL3381/dctA                    | C4-dicarboxylate transporter DctA                                                       | -2.3 |
| BCAM0086                         | Putative sodium:dicarboxylate symporter family protein                                  | -1.5 |
| BCAM1361                         | Permease component of an ABC transporter presumed to be involved in sugar transport     | -1.6 |
| BCAM2590                         | Major Facilitator Superfamily protein; similar to sugar transporters                    | -1.8 |
| BCAS0017                         | Putative fusaric acid resistance transporter protein                                    | -1.6 |
| BCAS0230                         | ATPase component of a Putative sugar ABC transporter                                    | -1.6 |
| BCAS0259                         | Putative sodium:dicarboxylate symporter family protein                                  | -1.7 |
| <i>Phosphate</i>                 |                                                                                         |      |
| BCAL1271/pstC                    | Phosphate transporter permease subunit PstC                                             | -1.9 |
| BCAL1272/pstA                    | Phosphate transporter permease subunit PtsA                                             | -2.4 |
| BCAL1273/pstB                    | ATPase component of a Putative phosphate ABC transporter                                | -2.5 |
| <i>Drugs</i>                     |                                                                                         |      |
| BCAL1510                         | Subunit of a MFS transporter predicted to be involved in drug efflux                    | -2.3 |
| BCAL1511/emrA                    | Subunit of a MFS transporter predicted to be involved in drug efflux                    | -1.7 |
| BCAM2337                         | Putative multidrug resistance transporter protein                                       | -1.8 |
| <i>Ions</i>                      |                                                                                         |      |
| BCAL1400                         | Sodium/hydrogen exchanger family protein                                                | -1.5 |
| BCAL2305                         | Putative potassium channel subunit                                                      | -2.4 |
| BCAM1745                         | Putative magnesium-transporting ATPase                                                  | -1.7 |
| <i>Aminoacids and polyamines</i> |                                                                                         |      |
| BCAM0096                         | ATPase component of a Putative polyamine ABC transporter                                | -2.0 |
| BCAM0952                         | ATPase component of a Putative polyamine ABC transporter                                | -1.6 |
| BCAM0954                         | Permease component of an ABC transporter presumed to be involved in polyamine transport | -1.5 |
| BCAM1477/aroP                    | Aromatic amino acid transport protein                                                   | -1.8 |
| BCAM2469                         | Putative amino-acid permease                                                            | -1.5 |
| BCAS0240                         | Periplasmic component of a Putative aminoacid ABC transporter                           | -1.6 |

*Others*

|          |                                                                                |      |
|----------|--------------------------------------------------------------------------------|------|
| BCAL0120 | Aquaporin Z                                                                    | -1.5 |
| BCAL1418 | Major Facilitator Superfamily protein                                          | -1.8 |
| BCAL1647 | Nodulation ABC transporter NodI                                                | -1.6 |
| BCAL2814 | ATPase component of a Putative ABC transporter                                 | -1.5 |
| BCAM0584 | Major Facilitator Superfamily protein                                          | -1.8 |
| BCAM2208 | Putative permease protein                                                      | -1.5 |
| BCAM2381 | Periplasmic component of a Putative ABC transporter involved in choline efflux | -1.7 |
| BCAM2383 | ATPase component of a Putative ABC transporter                                 | -1.5 |
| BCAM2556 | Putative purine nucleoside permease                                            | -2.7 |

***Cell envelope and outer membrane***

|               |                                                                                    |      |
|---------------|------------------------------------------------------------------------------------|------|
| BCAL0067      | ADP-heptose:LPS heptosyltransferase                                                | -1.6 |
| BCAL3110/waaA | 3-deoxy-D-manno-octulosonic-acid transferase involved in biosynthesis of O-antigen | -1.6 |
| BCAL3111/wbxY | Protein of unknown function that is involved in biosynthesis of O-antigen          | -1.6 |
| BCAL1076      | Putative outer membrane protein of unknown function; similar to OmpC               | -1.7 |
| BCAL1829      | Putative outer membrane protein                                                    | -5.3 |
| BCAL1956      | Putative lipoprotein                                                               | -2.0 |
| BCAL2024/mscl | Large-conductance mechanosensitive channel                                         | -2.0 |
| BCAL2205      | D-alanyl-D-alanine endopeptidase (penicillin-binding protein precursor)            | -1.6 |
| BCAL2645      | Putative OmpA family membrane protein; similar to P. aeruginosa OprF               | -2.6 |
| BCAL2829/htrA | HtrA protease; serine-type endopeptidase                                           | -1.7 |
| BCAL2958/ompA | Putative ompA family protein                                                       | -1.8 |
| BCAL3008      | Putative outer membrane porin protein; similar to P. aeruginosa OprE               | -5.2 |
| BCAL3166      | Putative lipoprotein containing a Putative phospholipid-binding domain             | -1.5 |
| BCAL3473      | Putative outer membrane porin                                                      | -1.6 |
| BCAM0186/bclA | Lectin                                                                             | -2.1 |
| BCAS0292      | Putative lectin                                                                    | -1.7 |
| BCAM0224      | Putative haemagglutinin-related autotransporter protein                            | -1.6 |
| BCAM0384      | Putative lipoprotein                                                               | -2.5 |
| BCAM505       | Putative membrane-attached protein                                                 | -2.1 |
| BCAM1015      | Putative porin                                                                     | -2.7 |
| BCAM1550      | Putative peptidoglycan-associated lipoprotein                                      | -2.3 |

|               |                                                                                                                                        |      |
|---------------|----------------------------------------------------------------------------------------------------------------------------------------|------|
| BCAM1598      | Putative lipoprotein                                                                                                                   | -1.7 |
| BCAM1737      | Putative exported glycoprotein                                                                                                         | -1.6 |
| BCAM1738      | Putative penicillin-binding protein                                                                                                    | -1.8 |
| BCAM1740      | Putative lipoprotein                                                                                                                   | -1.5 |
| BCAM1787      | Putative outer membrane porin; 30% similarity with the probable <i>P. aeruginosa</i> outer membrane receptor for iron transport PA4514 | -1.7 |
| BCAM1931      | Putative outer membrane porin                                                                                                          | -3.4 |
| BCAM2067/uppS | Putative undecaprenyl pyrophosphate synthetase involved in peptidoglycan biosynthesis                                                  | -3.7 |
| BCAM2143/adhA | Cable pilus associated adhesin protein                                                                                                 | -2.0 |
| BCAM2169      | Putative outer membrane autotransporter                                                                                                | -2.4 |
| BCAM2307/zmpB | Zinc metalloprotease ZmpB                                                                                                              | -3.5 |
| BCAS0236      | Putative haemagglutinin-related autotransporter protein                                                                                | -2.3 |
| BCAS0293/aidA | Nematocidal protease AidA                                                                                                              | -9.1 |
| BCAS0409/zmpA | Zinc metalloprotease ZmpA                                                                                                              | -7.8 |
| BCAS0460      | Putative porin protein                                                                                                                 | -2.1 |

### ***Protein synthesis***

|               |                                                             |      |
|---------------|-------------------------------------------------------------|------|
| BCAL0024/gidA | tRNA uridine 5-carboxymethylaminomethyl modification enzyme | -1.6 |
| BCALr1625     | tRNA-His                                                    | -1.5 |

### ***Motility and adherence***

|               |                                                                                                                 |      |
|---------------|-----------------------------------------------------------------------------------------------------------------|------|
| BCAL0124/flhD | Transcriptional activator of flagellar biosynthesis                                                             | -1.6 |
| BCAL0126/motA | Flagellar motor protein MotA                                                                                    | -2.3 |
| BCAL0127/motB | Flagellar motor protein MotB                                                                                    | -3.3 |
| BCAL0128/cheY | Chemotaxis two-component response regulator CheY                                                                | -2.1 |
| BCAL0131/tar  | Methyl-accepting chemotaxis protein                                                                             | -2.2 |
| BCAL1677      | Putative type-1 fimbrial protein                                                                                | -1.5 |
| BCAL2636      | Putative fimbriae chaperone                                                                                     | -1.9 |
| BCAS0181      | Putative methyl-accepting chemotaxis protein that functions in the transfer of receptor signals to the flagella | -1.8 |
| BCAL0480      | Rod shape-determining protein MreD                                                                              | -4.1 |
| BCAL0136      | Chemotaxis regulator CheZ                                                                                       | -2.7 |



***Protein folding and modification***

|                |                                                     |       |
|----------------|-----------------------------------------------------|-------|
| BCAL0540       | Putative ATPase similar to Lon proteases            | -1.8  |
| BCAL1233       | Putative heat shock Hsp20-related protein           | -1.5  |
| BCAL1612       | Putative arginyl-tRNA:protein arginyltransferase    | -2.3  |
| BCAL2442       | Heat shock protein 90                               | -1.8  |
| BCAL3146/groEL | Chaperonin GroEL                                    | -3.8  |
| BCAL3147/groES | Co-chaperonin GroES                                 | -4.5  |
| BCAM0548       | Chaperonin GroEL                                    | -3.1  |
| BCAM0549       | Co-chaperonin GroES                                 | -3.2  |
| BCAM0548       | Chaperonin GroEL                                    | -3.1  |
| BCAM1407       | Probable cysteine-peptidase of the DJ-1/PfpI family | -1.8  |
| BCAM2378/pepX  | x-prolyl-dipeptidyl aminopeptidase                  | -1.8  |
| BCAM2477       | Serine peptidase, family S10                        | -3.1  |
| BCAM2478       | Serine-carboxyl peptidase                           | -2.5  |
| BCAS0637/groEL | Chaperonin GroEL                                    | -27.5 |
| BCAS0638/groES | Co-chaperonin GroES                                 | -29.4 |

***Protein secretion******Ion homeostasis***

|               |                                                                                                       |      |
|---------------|-------------------------------------------------------------------------------------------------------|------|
| BCAL0116      | Putative TonB-dependent siderophore receptor; similar to ferric coprogen and ferric-rhodotorulic acid | -1.5 |
| BCAL0207      | Putative transcriptional regulator of the AsnC family                                                 | -2.8 |
| BCAL3297      | Putative ferritin DPS-family DNA binding protein                                                      | -3.5 |
| BCAM0491      | TonB-dependent receptor similar to ferric coprogen and ferric-rhodotorulic acid                       | -1.8 |
| BCAM2227/phcG | Putative pyochelin biosynthetic protein PchG                                                          | -1.6 |
| BCAM2230/phcE | Dihydroaeruginic acid synthetase PchE involved in pyochelin biosynthesis                              | -1.5 |

## ***Replication, transcription and transcriptional regulation***

### *Transcriptional regulators*

|               |                                                                                                  |      |
|---------------|--------------------------------------------------------------------------------------------------|------|
| BCAL0865      | RpiR family regulatory protein                                                                   | -1.5 |
| BCAL0054      | Putative transcriptional regulator of the MerR family                                            | -1.5 |
| BCAL0812      | sigma-54 modulation protein                                                                      | -6.9 |
| BCAL0867      | Endoribonuclease                                                                                 | -1.5 |
| BCAL0813/rpoN | Putative RNA polymerase sigma-54 factor                                                          | -1.5 |
| BCAL1217      | Transcriptional regulator of the LysR family                                                     | -1.6 |
| BCAL1230      | Transcriptional regulator of the LysR family                                                     | -1.6 |
| BCAL1274      | Putative transcriptional regulator predicted to have a role in phosphate uptake; similar to PhoU | -1.6 |
| BCAL1403      | Transcriptional regulator of the LysR family                                                     | -1.5 |
| BCAL1637      | Putative DNA-binding protein                                                                     | -1.6 |
| BCAL2309      | Putative transcriptional regulator of the MerR family                                            | -1.6 |
| BCAL2423      | Transcription factor of the TetR family                                                          | -2.2 |
| BCAL2443      | Transcription factor of the GntR family                                                          | -1.6 |
| BCAL2812      | Putative Fur family transcriptional regulator                                                    | -1.7 |
| BCAL3382      | Transcription factor of the GntR family                                                          | -1.6 |
| BCAM0189      | Transcriptional regulator of the AraC family                                                     | -2.6 |
| BCAM0530      | Transcription factor of the GntR family                                                          | -2.1 |
| BCAM0635      | Transcription factor of the AnsC family                                                          | -1.6 |
| BCAM0966      | Transcription factor of the GntR family                                                          | -1.7 |
| BCAM1139      | Transcription factor of the MarR family                                                          | -1.9 |
| BCAM1406      | Transcription factor of the LacI family                                                          | -1.6 |
| BCAM1483      | Cyclic nucleotide-binding transcriptional regulator                                              | -1.6 |
| BCAM1781      | Transcriptional regulator of the LysR family                                                     | -1.5 |
| BCAM1966      | Transcriptional regulator of the ArsR family                                                     | -2.3 |
| BCAM2019      | Transcriptional regulator of the AraC family                                                     | -1.6 |
| BCAM2059      | LuxR superfamily regulatory protein                                                              | -2.5 |
| BCAM2480      | Transcription factor of the AnsC family                                                          | -1.6 |
| BCAM2569      | Transcription factor of the IciR family                                                          | -2.0 |
| BCAM2652      | Transcription factor of the TetR family                                                          | -1.8 |
| BCAM2708      | Transcription factor of the IciR family                                                          | -1.9 |
| BCAM2777      | Transcriptional regulator of the LysR family                                                     | -1.6 |

|                      |                                                                            |       |
|----------------------|----------------------------------------------------------------------------|-------|
| BCAS0258             | Transcription factor of the GntR family                                    | -1.7  |
| BCAS0603             | Transcriptional regulator of the AraC family                               | -1.5  |
| BCAS0736             | Transcription factor of the TetR family                                    | -1.8  |
| BCAS0761             | Transcription factor of the AraC family                                    | -1.6  |
| BCAS0770             | Transcription factor of the LysR family                                    | -1.5  |
| BCAL0609             | transcriptional regulator-like                                             | -2.3  |
| BCAL02872            | sigma factor 70 EcfA2                                                      | -2.2  |
| BCAL1810             | Transcription factor of the TetR family                                    | -2.3  |
| <i>DNA repair</i>    |                                                                            |       |
| BCAL0437             | O6-methylguanine-DNA methyltransferase involved in DNA repair              | -1.6  |
| <i>Transcription</i> |                                                                            |       |
| BCAM0580             | RNase II stability modulator                                               | -1.6  |
| BCAM1351             | Putative regulatory protein similar to RNA polymerase-binding protein DksA | -2.9  |
| <i>Recombination</i> |                                                                            |       |
| BCAM1953             | Putative transposase                                                       | -1.5  |
| BCAL2773/xerD        | site-specific tyrosine recombinase XerD                                    | -1.6  |
| BCAL1142             | Transposase                                                                | -1.6  |
| BCAL1096             | Putative exodeoxyribonuclease V gamma chain involved in DNA recombination  | -1.5  |
| <i>Others</i>        |                                                                            |       |
| BCAL0460             | DNA topoisomerase III                                                      | -1.5  |
| BCAL3427/hctB        | Histone H1-like protein                                                    | -4.7  |
| BCAM0004/parB        | Chromosome partitioning protein ParB                                       | -1.7  |
| BCAM1012             | Putative histone-like protein                                              | -2.0  |
| BCAM2179             | Putative ribonuclease                                                      | -1.95 |
| BCAM2711             | H-NS histone family protein                                                | -1.73 |
| BCAS0191             | Putative endoribonuclease                                                  | -1.87 |

**Protein trafficking and secretion**

|                |                                                                                                                        |      |
|----------------|------------------------------------------------------------------------------------------------------------------------|------|
| BCAM2040/bcscQ | Type III secretion system protein                                                                                      | -1.7 |
| BCAM2041/bcscR | Type III secretion system protein                                                                                      | -1.7 |
| BCAM2042/virB1 | Type III secretion system protein                                                                                      | -1.7 |
| BCAM2048/bcscN | Type III secretion system protein                                                                                      | -1.7 |
| BCAM2050/bcscK | Type III secretion system protein                                                                                      | -1.7 |
| BCAM2051/bcscJ | Type III secretion system protein                                                                                      | -1.7 |
| BCAM2052       | Protein of unknown function of the type III secretion system                                                           | -1.7 |
| BCAM2053       | Protein of unknown function of the type III secretion system                                                           | -2.8 |
| BCAM2055/bcscC | Type III secretion system protein                                                                                      | -1.8 |
| BCAM2056/bcscS | Type III secretion system protein                                                                                      | -1.8 |
| BCAL0341       | Putative type VI secretion system protein TssB                                                                         | -1.6 |
| BCAL0344       | Putative type VI secretion system protein TssE                                                                         | -1.5 |
| BCAL1522       | Putative exported heme utilisation related protein; predicted to be involved in hemolysin activation/secretion protein | -1.8 |

**Signalling**

|               |                                                                                   |      |
|---------------|-----------------------------------------------------------------------------------|------|
| BCAL0534      | Two-component regulatory system, response regulator protein                       | -1.6 |
| BCAL0535      | Sensor kinase protein                                                             | -2.0 |
| BCAL1275/phoB | Phosphate regulon two-component regulatory system, response regulator protein     | -2.6 |
| BCAL1276      | Putative phosphate regulon two-component regulatory system, sensor kinase protein | -2.2 |
| BCAL1663      | PrkA family serine protein kinase                                                 | -1.8 |
| BCAM0221      | Two-component regulatory system, response regulator protein                       | -1.5 |
| BCAM0622      | Two-component regulatory system, sensor kinase protein                            | -1.5 |
| BCAM0623      | Two-component regulatory system, response regulator protein                       | -1.6 |
| BCAM1484      | Two-component regulatory system, response regulator protein                       | -1.6 |
| BCAL0128      | response regulator receiver protein                                               | -2.1 |

**Stress response**

|          |                                                                                 |      |
|----------|---------------------------------------------------------------------------------|------|
| BCAL0463 | Putative thioredoxin                                                            | -1.5 |
| BCAL0639 | Putative glutathione S-transferase involved in reduced glutathione biosynthesis | -1.6 |
| BCAL1250 | Putative glutathione S-transferase involved in glutathione biosynthesis         | -1.6 |

|               |                                                                                 |      |
|---------------|---------------------------------------------------------------------------------|------|
| BCAL2013      | Putative peroxiredoxin of the AhpC/TSA family                                   | -1.9 |
| BCAL2106/gpo  | Glutathione peroxidase                                                          | -1.8 |
| BCAL2268      | Putative stress protein                                                         | -2.0 |
| BCAL3299/katB | Peroxidase/catalase KatB                                                        | -1.6 |
| BCAL3331      | Putative glutathione S-transferase                                              | -1.7 |
| BCAM0050      | Universal stress-related protein; related to UspA                               | -3.0 |
| BCAM0507      | Similar to the general stress response protein CsbD                             | -3.8 |
| BCAM0590      | Putative glutathione S-transferase involved in reduced glutathione biosynthesis | -2.0 |
| BCAM1495      | Putative universal stress protein; similar to UspA                              | -4.1 |
| BCAM1500      | Putative universal stress protein                                               | -4.4 |
| BCAM1829      | Putative universal stress protein                                               | -2.1 |
| BCAM2385/arr  | Rifampin ADP-ribosyl transferase                                                | -1.7 |
| BCAS0726      | Methionine sulfoxide reductase A                                                | -1.8 |

### ***Phage-related genes***

|           |                  |       |
|-----------|------------------|-------|
| Bcen_3131 | transposase, IS4 | -2.20 |
|-----------|------------------|-------|

### ***Unknown***

|          |  |      |
|----------|--|------|
| BCAL0002 |  | -1.7 |
| BCAL0057 |  | -1.8 |
| BCAL0063 |  | -1.7 |
| BCAL0120 |  | -1.5 |
| BCAL0193 |  | -1.8 |
| BCAL0353 |  | -1.7 |
| BCAL0353 |  | -1.7 |
| BCAL0427 |  | -2.2 |
| BCAL0431 |  | -1.6 |
| BCAL0455 |  | -1.7 |
| BCAL0511 |  | -1.6 |
| BCAL0514 |  | -1.7 |
| BCAL0617 |  | -1.6 |
| BCAL0619 |  | -1.6 |
| BCAL0686 |  | -1.5 |
| BCAL0763 |  | -1.8 |

|           |      |
|-----------|------|
| BCAL0783  | -1.7 |
| BCAL0786  | -3.1 |
| BCAL0788  | -1.9 |
| BCAL0789  | -1.7 |
| BCAL0830  | -1.8 |
| BCAL0858  | -1.5 |
| BCAL0889  | -1.9 |
| BCAL0928  | -3.0 |
| BCAL0931  | -1.6 |
| BCAL0947a | -1.8 |
| BCAL1145  | -1.6 |
| BCAL1165  | -1.9 |
| BCAL1166  | -2.0 |
| BCAL1167  | -1.7 |
| BCAL1168  | -1.7 |
| BCAL1251  | -1.7 |
| BCAL1282  | -1.6 |
| BCAL1337  | -1.6 |
| BCAL1341  | -1.5 |
| BCAL1342  | -1.5 |
| BCAL1374  | -1.6 |
| BCAL1475  | -1.8 |
| BCAL1495  | -1.6 |
| BCAL1496  | -5.4 |
| BCAL1522  | -1.8 |
| BCAL1629  | -1.7 |
| BCAL1664  | -1.7 |
| BCAL1791  | -2.2 |
| BCAL1794  | -1.7 |
| BCAL1795  | -2.0 |
| BCAL1816  | -1.5 |
| BCAL1830  | -6.2 |
| BCAL1832  | -1.6 |
| BCAL1835  | -1.5 |

|           |      |
|-----------|------|
| BCAL1858  | -1.6 |
| BCAL1868  | -2.1 |
| BCAL1917  | -1.7 |
| BCAL1952  | -2.9 |
| BCAL2025  | -1.5 |
| BCAL2027  | -2.6 |
| BCAL2269  | -1.9 |
| BCAL2270  | -2.0 |
| BCAL2271  | -1.8 |
| BCAL2306  | -1.6 |
| BCAL2307  | -2.2 |
| BCAL2418  | -1.9 |
| BCAL2434  | -2.0 |
| BCAL2440  | -1.6 |
| BCAL2457  | -1.7 |
| BCAL2475a | -1.7 |
| BCAL2512  | -1.5 |
| BCAL2635  | -2.1 |
| BCAL2684  | -1.6 |
| BCAL2745  | -1.8 |
| BCAL2763  | -1.6 |
| BCAL2786  | -2.7 |
| BCAL2828  | -2.7 |
| BCAL2980  | -1.7 |
| BCAL2998  | -1.6 |
| BCAL3003  | -1.9 |
| BCAL3018  | -2.1 |
| BCAL3170  | -1.7 |
| BCAL3192  | -2.4 |
| BCAL3211  | -1.7 |
| BCAL3298  | -2.1 |
| BCAL3321  | -1.5 |
| BCAL3352  | -1.6 |
| BCAM0006  | -1.6 |

|               |      |
|---------------|------|
| BCAM0013      | -2.3 |
| BCAM0015      | -1.6 |
| BCAM0025      | -1.9 |
| BCAM0030      | -1.8 |
| BCAM0031      | -1.9 |
| BCAM0042      | -1.7 |
| BCAM0052      | -1.7 |
| BCAM0053/srpH | -1.5 |
| BCAM0165      | -1.6 |
| BCAM0190      | -1.9 |
| BCAM0338      | -1.6 |
| BCAM0339      | -1.6 |
| BCAM0444      | -1.6 |
| BCAM0493      | -1.9 |
| BCAM0529A     | -1.7 |
| BCAM0565      | -1.6 |
| BCAM0576      | -1.7 |
| BCAM0589      | -2.2 |
| BCAM0634      | -2.4 |
| BCAM0709      | -1.9 |
| BCAM0753      | -2.3 |
| BCAM0888      | -1.5 |
| BCAM0929      | -1.8 |
| BCAM0943      | -2.1 |
| BCAM1014      | -2.7 |
| BCAM1041      | -1.8 |
| BCAM1058      | -1.5 |
| BCAM1227      | -1.9 |
| BCAM1230      | -1.6 |
| BCAM1234      | -1.7 |
| BCAM1250      | -2.5 |
| BCAM1352      | -2.5 |
| BCAM1363      | -1.8 |
| BCAM1412      | -2.1 |



|               |      |
|---------------|------|
| BCAM1413a     | -2.7 |
| BCAM1414      | -2.2 |
| BCAM1443      | -2.7 |
| BCAM1479      | -1.6 |
| BCAM1480      | -2.9 |
| BCAM1481      | -4.2 |
| BCAM1482      | -3.5 |
| BCAM1492      | -2.0 |
| BCAM1496      | -2.0 |
| BCAM1502      | -5.0 |
| BCAM1529      | -1.6 |
| BCAM1538      | -1.9 |
| BCAM1547      | -1.7 |
| BCAM1548      | -1.6 |
| BCAM1569      | -2.2 |
| BCAM1589      | -1.6 |
| BCAM1601      | -1.8 |
| BCAM1602      | -2.8 |
| BCAM1733      | -1.8 |
| BCAM1735      | -2.1 |
| BCAM1736      | -2.0 |
| BCAM1742      | -2.6 |
| BCAM1777A     | -2.1 |
| BCAM1782      | -1.8 |
| BCAM1800      | -3.3 |
| BCAM1869      | -1.6 |
| BCAM1926      | -1.9 |
| BCAM1967/xenB | -2.2 |
| BCAM2062      | -1.7 |
| BCAM2068      | -2.3 |
| BCAM2069      | -1.9 |
| BCAM2071      | -1.9 |
| BCAM2083      | -1.6 |
| BCAM2084      | -1.8 |

|           |      |
|-----------|------|
| BCAM2085  | -1.6 |
| BCAM2154  | -1.7 |
| BCAM2167  | -2.3 |
| BCAM2178  | -1.6 |
| BCAM2181  | -2.3 |
| BCAM2182  | -2.1 |
| BCAM2199  | -1.5 |
| BCAM2206  | -1.8 |
| BCAM2207  | -1.6 |
| BCAM2213  | -1.6 |
| BCAM2237  | -1.6 |
| BCAM2238  | -1.8 |
| BCAM2253A | -1.8 |
| BCAM2254  | -1.9 |
| BCAM2287  | -1.7 |
| BCAM2308  | -2.5 |
| BCAM2309  | -1.6 |
| BCAM2336  | -1.8 |
| BCAM2338  | -2.3 |
| BCAM2339  | -1.7 |
| BCAM2357  | -2.2 |
| BCAM2377  | -1.5 |
| BCAM2379  | -1.7 |
| BCAM2402  | -1.7 |
| BCAM2403  | -1.6 |
| BCAM2405  | -2.3 |
| BCAM2413  | -1.5 |
| BCAM2487  | -1.8 |
| BCAM2504  | -2.3 |
| BCAM2518  | -1.6 |
| BCAM2555  | -2.3 |
| BCAM2595  | -1.5 |
| BCAM2625  | -1.7 |
| BCAM2642  | -1.6 |

|           |      |
|-----------|------|
| BCAM2657  | -1.6 |
| BCAM2690  | -1.6 |
| BCAM2705  | -1.5 |
| BCAM2706  | -1.7 |
| BCAM2713  | -1.6 |
| BCAM2731  | -1.7 |
| BCAM2740  | -1.5 |
| BCAM2741  | -1.5 |
| BCAM2742  | -3.4 |
| BCAM2755  | -1.7 |
| BCAM2834  | -1.5 |
| BCAS0016  | -2.0 |
| BCAS0098  | -1.5 |
| BCAS0154  | -1.7 |
| BCAS0155  | -1.8 |
| BCAS0159  | -1.5 |
| BCAS0194  | -1.6 |
| BCAS0246  | -2.1 |
| BCAS0260  | -1.7 |
| BCAS0292  | -1.7 |
| BCAS0319  | -1.8 |
| BCAS0331  | -1.8 |
| BCAS0371  | -1.5 |
| BCAS0406  | -2.3 |
| BCAS0407  | -1.5 |
| BCAS0636  | -9.9 |
| BCAS0640  | -3.2 |
| BCAS0760  | -1.7 |
| BCAS0762  | -1.5 |
| Bcen_2651 | -2.4 |
| BCAL0108  | -2.2 |
| Bcen_2885 | -3.1 |
| Bcen_2886 | -5.3 |
| Bcen_2900 | -2.1 |

|          |                                                  |      |
|----------|--------------------------------------------------|------|
| BCAL0436 |                                                  | -1.6 |
| BCAM2163 |                                                  | -2.0 |
| BCAM2350 | ATPase component of a Putative ABC transporter   | -1.5 |
| BCAM2351 | Permease component of a Putative ABC transporter | -1.5 |
| BCAM0505 | Putative membrane-attached protein               | -2.1 |

**Genes down-regulated in IST4113, compared to IST439, sorted by gene number**

BCAL0002  
BCAL0024  
BCAL0042  
BCAL0046  
BCAL0047  
BCAL0054  
BCAL0057  
BCAL0063  
BCAL0064  
BCAL0067  
BCAL0068  
BCAL0108  
BCAL0116  
BCAL0120  
BCAL0120  
BCAL0124  
BCAL0126  
BCAL0127  
BCAL0128  
BCAL0128  
BCAL0131  
BCAL0136  
BCAL0193  
BCAL0207  
BCAL0212  
BCAL0213  
BCAL0282  
BCAL0283  
BCAL02872  
BCAL0317  
BCAL0319

BCAL0328  
BCAL0329  
BCAL0330  
BCAL0341  
BCAL0344  
BCAL0353  
BCAL0353  
BCAL0388  
BCAL0398  
BCAL0404  
BCAL0405  
BCAL0406  
BCAL0407  
BCAL0408  
BCAL0427  
BCAL0431  
BCAL0436  
BCAL0437  
BCAL0455  
BCAL0460  
BCAL0460  
BCAL0463  
BCAL0476  
BCAL0480  
BCAL0503  
BCAL0511  
BCAL0514  
BCAL0534  
BCAL0535  
BCAL0536  
BCAL0540  
BCAL0543  
BCAL0609  
BCAL0617

BCAL0619  
BCAL0639  
BCAL0686  
BCAL0763  
BCAL0783  
BCAL0784  
BCAL0785  
BCAL0786  
BCAL0788  
BCAL0789  
BCAL0812  
BCAL0813  
BCAL0830  
BCAL0858  
BCAL0865  
BCAL0867  
BCAL0889  
BCAL0928  
BCAL0931  
BCAL0947a  
BCAL1046  
BCAL1047  
BCAL1076  
BCAL1096  
BCAL1142  
BCAL1145  
BCAL1165  
BCAL1166  
BCAL1167  
BCAL1168  
BCAL1217  
BCAL1230  
BCAL1233  
BCAL1247

BCAL1249  
BCAL1250  
BCAL1251  
BCAL1271  
BCAL1272  
BCAL1273  
BCAL1274  
BCAL1275  
BCAL1276  
BCAL1282  
BCAL1337  
BCAL1341  
BCAL1342  
BCAL1374  
BCAL1390  
BCAL1400  
BCAL1403  
BCAL1418  
BCAL1472  
BCAL1473  
BCAL1475  
BCAL1495  
BCAL1496  
BCAL1510  
BCAL1511  
BCAL1522  
BCAL1522  
BCAL1612  
BCAL1629  
BCAL1637  
BCAL1647  
BCAL1663  
BCAL1664  
BCAL1677



BCAL1791  
BCAL1794  
BCAL1795  
BCAL1810  
BCAL1816  
BCAL1829  
BCAL1830  
BCAL1832  
BCAL1835  
BCAL1858  
BCAL1868  
BCAL1917  
BCAL1952  
BCAL1956  
BCAL1975  
BCAL2013  
BCAL2024  
BCAL2025  
BCAL2027  
BCAL2041  
BCAL2106  
BCAL2141  
BCAL2142  
BCAL2143  
BCAL2144  
BCAL2205  
BCAL2206  
BCAL2268  
BCAL2269  
BCAL2270  
BCAL2271  
BCAL2305  
BCAL2306  
BCAL2307

BCAL2309  
BCAL2352  
BCAL2418  
BCAL2423  
BCAL2434  
BCAL2440  
BCAL2441  
BCAL2442  
BCAL2443  
BCAL2457  
BCAL2472  
BCAL2475a  
BCAL2512  
BCAL2635  
BCAL2636  
BCAL2645  
BCAL2680  
BCAL2681  
BCAL2682  
BCAL2683  
BCAL2684  
BCAL2690  
BCAL2745  
BCAL2746  
BCAL2763  
BCAL2773  
BCAL2783  
BCAL2786  
BCAL2791  
BCAL2792  
BCAL2812  
BCAL2814  
BCAL2828  
BCAL2829

BCAL2899  
BCAL2958  
BCAL2980  
BCAL2998  
BCAL3003  
BCAL3008  
BCAL3018  
BCAL3107  
BCAL3110  
BCAL3111  
BCAL3146  
BCAL3147  
BCAL3166  
BCAL3170  
BCAL3191  
BCAL3192  
BCAL3211  
BCAL3276  
BCAL3296  
BCAL3297  
BCAL3298  
BCAL3299  
BCAL3321  
BCAL3331  
BCAL3352  
BCAL3359  
BCAL3379  
BCAL3380  
BCAL3381  
BCAL3382  
BCAL3390  
BCAL3427  
BCAL3428  
BCAL3473

BCALr1625  
BCAM0004  
BCAM0006  
BCAM0013  
BCAM0015  
BCAM0023  
BCAM0025  
BCAM0030  
BCAM0031  
BCAM0042  
BCAM0050  
BCAM0052  
BCAM0053  
BCAM0086  
BCAM0096  
BCAM0138  
BCAM0165  
BCAM0186  
BCAM0189  
BCAM0190  
BCAM0221  
BCAM0224  
BCAM0254  
BCAM0338  
BCAM0339  
BCAM0384  
BCAM0408  
BCAM0416  
BCAM0444  
BCAM0491  
BCAM0493  
BCAM0505  
BCAM0507  
BCAM0529A

BCAM0530  
BCAM0548  
BCAM0548  
BCAM0549  
BCAM0565  
BCAM0576  
BCAM0580  
BCAM0584  
BCAM0589  
BCAM0590  
BCAM0592  
BCAM0622  
BCAM0623  
BCAM0634  
BCAM0635  
BCAM0709  
BCAM0753  
BCAM0774  
BCAM0888  
BCAM0929  
BCAM0943  
BCAM0946  
BCAM0952  
BCAM0954  
BCAM0962  
BCAM0964  
BCAM0965  
BCAM0966  
BCAM1012  
BCAM1014  
BCAM1015  
BCAM1041  
BCAM1058  
BCAM1111

BCAM1112  
BCAM1139  
BCAM1227  
BCAM1230  
BCAM1234  
BCAM1250  
BCAM1351  
BCAM1352  
BCAM1353  
BCAM1361  
BCAM1363  
BCAM1406  
BCAM1407  
BCAM1412  
BCAM1413a  
BCAM1414  
BCAM1430  
BCAM1443  
BCAM1477  
BCAM1479  
BCAM1480  
BCAM1481  
BCAM1482  
BCAM1483  
BCAM1484  
BCAM1492  
BCAM1495  
BCAM1496  
BCAM1500  
BCAM1502  
BCAM1529  
BCAM1538  
BCAM1547  
BCAM1548

BCAM1550  
BCAM1569  
BCAM1570  
BCAM1589  
BCAM1598  
BCAM1601  
BCAM1602  
BCAM1733  
BCAM1734  
BCAM1734  
BCAM1735  
BCAM1736  
BCAM1737  
BCAM1738  
BCAM1740  
BCAM1742  
BCAM1745  
BCAM1777A  
BCAM1781  
BCAM1782  
BCAM1787  
BCAM1800  
BCAM1829  
BCAM1833  
BCAM1869  
BCAM1926  
BCAM1931  
BCAM1953  
BCAM1966  
BCAM1967/xenB  
BCAM2006  
BCAM2019  
BCAM2040  
BCAM2041

BCAM2042  
BCAM2048  
BCAM2050  
BCAM2051  
BCAM2052  
BCAM2053  
BCAM2055  
BCAM2056  
BCAM2059  
BCAM2062  
BCAM2067  
BCAM2068  
BCAM2069  
BCAM2071  
BCAM2080  
BCAM2083  
BCAM2084  
BCAM2085  
BCAM2143  
BCAM2154  
BCAM2163  
BCAM2167  
BCAM2169  
BCAM2176  
BCAM2178  
BCAM2179  
BCAM2181  
BCAM2182  
BCAM2199  
BCAM2206  
BCAM2207  
BCAM2208  
BCAM2213  
BCAM2227



BCAM2230  
BCAM2237  
BCAM2238  
BCAM2253A  
BCAM2254  
BCAM2287  
BCAM2307  
BCAM2308  
BCAM2309  
BCAM2319  
BCAM2325  
BCAM2326  
BCAM2336  
BCAM2337  
BCAM2338  
BCAM2339  
BCAM2340  
BCAM2343  
BCAM2350  
BCAM2351  
BCAM2357  
BCAM2377  
BCAM2378  
BCAM2379  
BCAM2381  
BCAM2383  
BCAM2385  
BCAM2392  
BCAM2402  
BCAM2403  
BCAM2405  
BCAM2413  
BCAM2430  
BCAM2431

BCAM2432  
BCAM2433  
BCAM2469  
BCAM2477  
BCAM2478  
BCAM2480  
BCAM2487  
BCAM2504  
BCAM2518  
BCAM2555  
BCAM2556  
BCAM2568  
BCAM2569  
BCAM2590  
BCAM2591  
BCAM2595  
BCAM2607  
BCAM2625  
BCAM2642  
BCAM2652  
BCAM2657  
BCAM2690  
BCAM2705  
BCAM2706  
BCAM2708  
BCAM2710  
BCAM2711  
BCAM2713  
BCAM2731  
BCAM2740  
BCAM2741  
BCAM2742  
BCAM2755  
BCAM2777

BCAM2791  
BCAM2822  
BCAM2834  
BCAM505  
BCAS0016  
BCAS0017  
BCAS0023  
BCAS0034  
BCAS0098  
BCAS0154  
BCAS0155  
BCAS0159  
BCAS0181  
BCAS0191  
BCAS0194  
BCAS0230  
BCAS0236  
BCAS0240  
BCAS0246  
BCAS0253  
BCAS0258  
BCAS0259  
BCAS0260  
BCAS0292  
BCAS0292  
BCAS0293  
BCAS0319  
BCAS0320  
BCAS0331  
BCAS0371  
BCAS0406  
BCAS0407  
BCAS0409  
BCAS0460

BCAS0603  
BCAS0636  
BCAS0637  
BCAS0638  
BCAS0640  
BCAS0726  
BCAS0736  
BCAS0760  
BCAS0761  
BCAS0762  
BCAS0770  
Bcen\_2651  
Bcen\_2885  
Bcen\_2886  
Bcen\_2900  
Bcen\_3131
