# Supplementary material for: Genomic Expression Analysis Reveals Strategies of Burkholderia cenocepacia to Adapt to Cystic Fibrosis Patients' Airways and Antimicrobial Therapy
Source: PubMed Central journal article supplement (PMC3244429; doi:10.1371/journal.pone.0028831), 2011-12-21
Supplement: pone.0028831.s004.pdf [file pone.0028831.s004.pdf]

**Table S3 - List of genes having an altered expression in IST439 and IST4113 that are documented to be regulated by CciR.** The microarray dataset was searched for genes documented to be activated or repressed by the CciR transcription factor using the results of O'Grady et al., (2010).

**Genes up-regulated in IST4113 and documented to be activated by CciR**

|          |          |
|----------|----------|
| BCAL0683 | BCAL0140 |
| BCAL0110 | BCAL0683 |
| BCAL0144 | BCAL0151 |
| BCAL0425 | BCAL1742 |
| BCAL0600 |          |
| BCAL0778 | BCAL2734 |
| BCAL0779 | BCAM0153 |
| BCAL0780 | BCAM0166 |
| BCAL1671 | BCAM0693 |
| BCAL1944 | BCAM0705 |
| BCAL2354 | BCAM1305 |
| BCAL2715 | BCAM1700 |
| BCAM1377 | BCAM2589 |
| BCAM1427 | BCAM2674 |
| BCAM1588 | BCAS0110 |
| BCAM2545 | BCAS0383 |
| BCAS0138 | BCAS0387 |
| BCAS0386 | BCAS0388 |
| BCAS0397 | BCAS0396 |

**Genes down-regulated in IST4113 and documented to be repressed by CciR**

|          |          |           |          |          |
|----------|----------|-----------|----------|----------|
| BCAM0186 | BCAL0124 | BCAM0339  | BCAM1966 | BCAM2469 |
| BCAS0409 | BCAL0283 | BCAM0529A | BCAM2053 | BCAM2568 |
| BCAL0064 | BCAL1145 | BCAM0634  | BCAM2062 | BCAM2731 |
| BCAL0437 | BCAL1677 | BCAM0774  | BCAM2287 | BCAS0638 |
| BCAL2635 | BCAL1952 | BCAM0965  | BCAM2307 |          |
| BCAL2636 | BCAL2268 | BCAM1111  | BCAM2319 |          |
| BCAL2828 | BCAL2270 | BCAM1112  | BCAM2325 |          |
| BCAL2829 | BCAL2352 | BCAM1250  | BCAM2377 |          |
| BCAM0943 | BCAL2457 | BCAM1412  | BCAM2379 |          |
| BCAM1733 | BCAL2472 | BCAM1734  | BCAM2430 |          |
| BCAM2167 | BCAL3427 | BCAM1742  | BCAM2431 |          |
| BCAM2652 | BCAM0013 | BCAM1800  | BCAM2432 |          |
