# Supplementary material for: Genomic Expression Analysis Reveals Strategies of Burkholderia cenocepacia to Adapt to Cystic Fibrosis Patients' Airways and Antimicrobial Therapy
Source: PubMed Central journal article supplement (PMC3244429; doi:10.1371/journal.pone.0028831), 2011-12-21
Supplement: pone.0028831.s005.pdf [file pone.0028831.s005.pdf]

1 **Table S5.** Proteins found in the membrane-enriched fraction and in the cytosolic fraction whose  
2 content was increased (above 1.5-fold) or decreased (below 0.7-fold) in the proteome of  
3 IST4113 cells, compared to the values registered in IST439 (Madeira et al., 2011). The genes  
4 predicted to encode these proteins are also indicated and those found to be differently expressed  
5 in the two variants, based on the results of the microarray analysis carried out in this study, are  
6 highlighted in bold.

7

| <b>Spot<br/>(nr.)</b>                                                | <b>Protein Function (Gene name)</b>                                                  | <b>Fold Change<br/>Protein content<br/>(IST4113/IST439)</b> | <b>Fold Change<br/>Gene Expression<br/>(IST4113/IST439)</b> |
|----------------------------------------------------------------------|--------------------------------------------------------------------------------------|-------------------------------------------------------------|-------------------------------------------------------------|
| <b>Amino acid metabolism and transport</b>                           |                                                                                      |                                                             |                                                             |
| 16                                                                   | Oligopeptidase A, Zn-dependent oligopeptidases (BCAL2213)                            | 2.5                                                         | -                                                           |
| 36                                                                   | Acetylglutamate kinase (ArgB; BCAL0496)                                              | 1.6                                                         | -                                                           |
| 37                                                                   |                                                                                      | 2.4                                                         |                                                             |
| 52                                                                   | ATP phosphoribosyltransferase (HisG; BCAL0311)                                       | 2.2                                                         | -                                                           |
| 90                                                                   | <b>Saccharopine dehydrogenase (Lys1; BCAL1796)</b>                                   | <b>0.7</b>                                                  | <b>1.5</b>                                                  |
| 96                                                                   |                                                                                      | 0.7                                                         |                                                             |
| 143                                                                  | Serine-pyruvate aminotransferase (BCAM0512)                                          | 2.5                                                         |                                                             |
| 153                                                                  | Histidinol dehydrogenase (HisD; BCAL0312)                                            | 1.5                                                         | -                                                           |
| <b>Cell envelope biogenesis, outer membrane and lipid metabolism</b> |                                                                                      |                                                             |                                                             |
| 15                                                                   | <b>Acetyl/propionyl-CoA carboxylase, alpha subunit (BCAM2430)</b>                    | <b>2.0</b>                                                  | <b>0.6</b>                                                  |
| 35                                                                   | D-alanine-D-alanine ligase (Ddl; BCAL3460)                                           | 2.0                                                         | -                                                           |
| 44                                                                   | <b>Enoyl-CoA hydratase/carnithine racemase (BCAL0409)</b>                            | <b>0.7</b>                                                  | <b>0.5</b>                                                  |
| 68                                                                   | FAD-binding 9, Siderophore-interacting protein (BCAM0026)                            | 3.2                                                         | -                                                           |
| 149                                                                  | <b>Cyclopropane fatty acid synthase (BCAL2783)</b>                                   | <b>3.1</b>                                                  | <b>0.5</b>                                                  |
| 156                                                                  | Acyl-coenzyme A synthetases/AMP-(fatty) acid ligase/acetyl-CoA synthetase (BCAL2284) | 1.9                                                         | -                                                           |
| 167                                                                  | Acetyl-CoA carboxylase biotin carboxyl carrier protein subunit (AccA)(BCAL3420)      | 0.6                                                         | -                                                           |
| 198                                                                  | (3R)-hydroxymyristoyl-(acyl carrier protein) dehydratase (FabZ)                      | 0.7                                                         | -                                                           |
| <b>Energy production and conversion</b>                              |                                                                                      |                                                             |                                                             |
| 9                                                                    | Pyruvate dehydrogenase complex, dehydrogenase (E1) component (AceE)                  | 3.5                                                         | -                                                           |

| Spot<br>(nr.)                                                       | Protein Function (Gene name)                                                                               | Fold Change<br>Protein content<br>(IST4113/IST439) | Fold Change<br>Gene Expression<br>(IST4113/IST439) |
|---------------------------------------------------------------------|------------------------------------------------------------------------------------------------------------|----------------------------------------------------|----------------------------------------------------|
| 155                                                                 |                                                                                                            | 3.4                                                | -                                                  |
| 160                                                                 |                                                                                                            | 3.4                                                | -                                                  |
| 10                                                                  | Aconitate hydratase (AcnA)(BCAM2701)                                                                       | 3.0                                                | -                                                  |
| 13                                                                  | Transketolase (Tkt)(BCAL3389)                                                                              | 1.5                                                | -                                                  |
| 38                                                                  | Electron transfer flavoprotein, alpha subunit (FixB)(BCAL2934)                                             | 1.6                                                | -                                                  |
| 47                                                                  | 2-keto-3-deoxy-6-phosphogluconate aldolase (Eda)(BCAL3366)                                                 | 1.5                                                | -                                                  |
| 81                                                                  | <b>Aldo/keto reductase (Tas)(BCAM0042)</b>                                                                 | <b>2.3</b>                                         | <b>0.6</b>                                         |
| 92                                                                  | Fructose/tagatose bisphosphate aldolase (Fba)(BCAL2839)                                                    | 2.1                                                | -                                                  |
| 108                                                                 | Citrate synthase (GltA)(BCAM0972)                                                                          | 2.3                                                | -                                                  |
| 109                                                                 | Dihydrolipoamide dehydrogenase (LpdA)(BCAL1517)                                                            | 3.0                                                | -                                                  |
| 189                                                                 |                                                                                                            | 1.7                                                | -                                                  |
| 112                                                                 | NAD-dependent aldehyde dehydrogenase (BCAM2468)                                                            | 3.4                                                | -                                                  |
| 132                                                                 | NADH dehydrogenase/NADH:ubiquinone oxidoreductase 75 kD (NuoG)(BCAL2338)                                   | 3.6                                                | -                                                  |
| 147                                                                 | Phosphopyruvate hydratase (Eno)(BCAL2179)                                                                  | 0.7                                                | -                                                  |
| 168                                                                 | Malate synthase G (AceB)(BCAM2821)                                                                         | 2.6                                                | -                                                  |
| 170                                                                 | Phosphoenolpyruvate carboxykinase (PckG)(BCAM1581)                                                         | 3.8                                                | -                                                  |
| 171                                                                 |                                                                                                            | 3.9                                                | -                                                  |
| <b>Nucleotide transport and metabolism</b>                          |                                                                                                            |                                                    |                                                    |
| 3                                                                   | Carbamoyl phosphate synthase large subunit (CarB)(BCAL1262)                                                | 2.2                                                | -                                                  |
| 33                                                                  | Phosphoribosylaminoimidazole (AIR) synthetase (PurM)(BCAL3162)                                             | 2.3                                                | -                                                  |
| 105                                                                 | Adenylosuccinate synthetase (PurA)(BCAL1873)                                                               | 0.7                                                | -                                                  |
| 113                                                                 | Bifunctional phosphoribosylaminoimidazolecarboxamide formyltransferase/IMP cyclohydrolase (PurH)(BCAL3336) | 5.2                                                | -                                                  |
| 115                                                                 | <b>Bifunctional GMP synthase/Glutamine amidotransferase protein (GuaA)(BCAL2061)</b>                       | <b>1.5</b>                                         | <b>1.7</b>                                         |
| 121                                                                 | <b>IMP dehydrogenase/GMP reductase (GuaB)(BCAL2063)</b>                                                    | <b>3.2</b>                                         | <b>1.5</b>                                         |
| <b>Posttranslational modification, protein turnover, chaperones</b> |                                                                                                            |                                                    |                                                    |
| 2                                                                   | Molecular chaperone DnaK (DnaK)(BCAL3270)                                                                  | 2.0                                                | -                                                  |
| 154                                                                 |                                                                                                            | 2.1                                                | -                                                  |
| 8                                                                   | AAA ATPase (ClpB)(BCAL1919)                                                                                | 6.0                                                | -                                                  |

| Spot (nr.)                                                          | Protein Function (Gene name)                                       | Fold Change Protein content (IST4113/IST439) | Fold Change Gene Expression (IST4113/IST439) |
|---------------------------------------------------------------------|--------------------------------------------------------------------|----------------------------------------------|----------------------------------------------|
| 159                                                                 |                                                                    | 5.4                                          | -                                            |
| 29                                                                  | ATP-dependent Clp protease proteolytic subunit (ClpP)(BCAL1996)    | 0.7                                          | -                                            |
| 130                                                                 | <b>60 kDa chaperonin (GroEL)(BCAL3146)</b>                         | <b>1.7</b>                                   | <b>0.3</b>                                   |
| 176                                                                 | <b>Trigger factor (Tig)(BCAL1997)</b>                              | <b>2.6</b>                                   | <b>1.5</b>                                   |
| <b>Secondary metabolites biosynthesis, transport and catabolism</b> |                                                                    |                                              |                                              |
| 34                                                                  | <b>Acetoacetate decarboxylase (Adc)(BCAM0023)</b>                  | <b>2.1</b>                                   | <b>0.6</b>                                   |
| 64                                                                  | 3-hydroxybutyrate dehydrogenase (Bdh)(BCAM0022)                    | 2.3                                          | -                                            |
| <b>Translation</b>                                                  |                                                                    |                                              |                                              |
| 4                                                                   | Leucyl-tRNA synthetase (LeuS)(BCAL3373)                            | 3.4                                          | -                                            |
| 7                                                                   | Phenylalanyl-tRNA synthetase (PheT)(BCAL1486)                      | 3.6                                          | -                                            |
| 17                                                                  | <b>Ribosomal protein S1 (RpsA)</b>                                 | <b>2.7</b>                                   | <b>1.7</b>                                   |
| 18                                                                  |                                                                    | 2.3                                          | -                                            |
| 177                                                                 |                                                                    | 2.4                                          | -                                            |
| 22                                                                  | <b>Elongation factor Tu (Tuf)</b>                                  | <b>2.9</b>                                   | <b>1.8</b>                                   |
| 178                                                                 | Alanyl-tRNA synthetase (AlaS)(BCAL1416)                            | 2.9                                          | -                                            |
| 181                                                                 | Arginyl-tRNA synthetase (ArgS)(BCAL0679)                           | 2.9                                          | -                                            |
| 183                                                                 | Aspartyl/glutamyl-tRNA amidotransferase subunit A (GatA)(BCAL0484) | 4.1                                          | -                                            |
| 186                                                                 | <b>Elongation factor G (FusA)(BCAL0231)</b>                        | <b>2.5</b>                                   | <b>2.5</b>                                   |
| 187                                                                 | Isoleucyl-tRNA synthetase (IleS)(BCAL2724)                         | 2.5                                          | -                                            |
| 190                                                                 | Elongation factor Ts (Tsf)(BCAL2090)                               | 2.3                                          | -                                            |
| <b>Other functions</b>                                              |                                                                    |                                              |                                              |
| <i>Defense mechanisms</i>                                           |                                                                    |                                              |                                              |
| 75                                                                  | Carboxylesterase (BCAL2816)                                        | 1.6                                          | -                                            |
| <i>Coenzyme metabolism</i>                                          |                                                                    |                                              |                                              |
| 20                                                                  | S-adenosylmethionine synthetase (MetK)(BCAL0509)                   | 0.7                                          | -                                            |
| 69                                                                  | Methenyltetrahydrofolate cyclohydrolase (FolD)(BCAL2212)           | 1.6                                          | -                                            |
| <i>Antioxidants</i>                                                 |                                                                    |                                              |                                              |
| 201                                                                 | Putative hydroperoxide reductase (AhpC)                            | 0.7                                          | -                                            |
| <b>Unknown function</b>                                             |                                                                    |                                              |                                              |
| 128                                                                 | <b>Conserved hypothetical protein (BCAS0291)</b>                   | <b>3.0</b>                                   | <b>0.1</b>                                   |

| Spot<br>(nr.) | Protein Function (Gene name)              | Fold Change<br>Protein content<br>(IST4113/IST439) | Fold Change<br>Gene Expression<br>(IST4113/IST439) |
|---------------|-------------------------------------------|----------------------------------------------------|----------------------------------------------------|
| 131           | Conserved hypothetical protein (BCAS0292) | 0.7                                                | 0.7                                                |

8

9 **PROTEINS FOUND IN THE MEMBRANE-ENRICHED FRACTION**

| Spot<br>(nr.) | Protein description(Gene name) | Fold Change<br>Protein content<br>(IST4113/IST439) | Fold Change<br>Gene Expression<br>(IST4113/IST439) |
|---------------|--------------------------------|----------------------------------------------------|----------------------------------------------------|
|---------------|--------------------------------|----------------------------------------------------|----------------------------------------------------|

**Amino acid metabolism and transport**

|     |                                                           |     |     |
|-----|-----------------------------------------------------------|-----|-----|
| 231 | ABC transporter (LivF)(BCAM2247)                          | 1.5 | 2.1 |
| 255 | 5,10-methylenetetrahydrofolate reductase (MetF)(BCAL0147) | 0.5 | -   |
| 270 | Glycine/serine hydroxymethyltransferase (GlyA)(BCAL3197)  | 0.7 | -   |
| 277 | Lysine decarboxylase (BCAL2641)                           | 0.4 | -   |

**Cell envelope biogenesis, outer membrane and lipid metabolism**

|     |                                                      |     |   |
|-----|------------------------------------------------------|-----|---|
| 201 | Outer membrane protein/protective antigen (BCAL2083) | 4.7 | - |
| 267 | Phosphomannomutase (BCAL3113)                        | 0.7 | - |
| 269 | NAD-dependent epimerase/dehydratase (BCAL1071)       | 0.6 | - |

**Energy production and conversion**

|     |                                                                |            |            |
|-----|----------------------------------------------------------------|------------|------------|
| 205 | Succinate dehydrogenase flavoprotein subunit (SdhA)(BCAM0969)  | 1.6        | -          |
| 227 | F0F1-type ATP synthase, alpha subunit (AtpA)(BCAL0034)         | 1.8        | -          |
| 229 | <b>Isocitrate lyase (AceA)(BCAM1588)</b>                       | <b>1.5</b> | <b>2.3</b> |
| 254 | Transketolase (Tkt)(BCAL3389)                                  | 0.5        | -          |
| 257 | Electron transfer flavoprotein, alpha subunit (FixB)(BCAL2934) | 0.5        | -          |
| 261 | Fumarase (FumC)(BCAL2908)                                      | 0.6        | -          |
| 276 | Phosphoenolpyruvate synthase (PpsA)(BCAL2074)                  | 0.5        | -          |

**Adaptation to atypical conditions**

|     |                                                        |     |   |
|-----|--------------------------------------------------------|-----|---|
| 252 | PhoH-like protein (BCAL1937)                           | 0.5 | - |
| 258 | Transcription antitermination protein (NusG)(BCAL0221) | 0.6 | - |

**Translation**

|     |                                                          |     |   |
|-----|----------------------------------------------------------|-----|---|
| 256 | YbaK/prolyl-tRNA synthetase associated region (BCAL0630) | 0.5 | - |
|-----|----------------------------------------------------------|-----|---|

| Spot<br>(nr.)                                  | Protein description(Gene name)                    | Fold Change<br>Protein content<br>(IST4113/IST439) | Fold Change<br>Gene Expression<br>(IST4113/IST439) |
|------------------------------------------------|---------------------------------------------------|----------------------------------------------------|----------------------------------------------------|
| <b>Inorganic ion transport and metabolism</b>  |                                                   |                                                    |                                                    |
| 202                                            | TonB-dependent siderophore receptor (BCAM2224)    | 1.8                                                | -                                                  |
| 203                                            | TonB-dependent copper receptor (BCAM0948)         | 1.8                                                | -                                                  |
| <b>Intracellular trafficking and secretion</b> |                                                   |                                                    |                                                    |
| 232                                            | Predicted periplasmic/secreted protein (BCAL2669) | 1.7                                                | -                                                  |
| <b>Transport of small molecules</b>            |                                                   |                                                    |                                                    |
| 235                                            | ABC transporter related (BCAM1210)                | 1.6                                                | -                                                  |
| 263                                            | Extracellular solute-binding protein (BCAS0242)   | 0.6                                                | -                                                  |

10

11

12

13
